# Supplementary material for: Computational screening of M1/PW12O40 single-atom electrocatalysts for water splitting and oxygen reduction reactions
Source: Royal Society of Chemistry journal article supplement (doi:10.1039/d3ta02468g), 2023-01-01
Supplement: d3ta02468g1.pdf [file d3ta02468g1.pdf]

## SUPPORTING INFORMATION

### Computational Screening of $M_1/PW_{12}O_{40}$ Single-Atom Electrocatalysts for Water Splitting and Oxygen Reduction Reactions

Shamraiz Hussain Talib<sup>a,b</sup>, Babar Ali<sup>c</sup>, Sharmarke Mohamed<sup>a,b\*</sup>, Xue-Lian Jiang<sup>d</sup>, Khalil Ahmad<sup>e</sup>, Ahsanulhaq Qurashi<sup>a,b\*</sup>, and Jun Li<sup>d,f\*</sup>

<sup>a</sup>Advanced Materials Chemistry Centre (AMCC), Khalifa University of Science and Technology, Abu Dhabi, P.O. Box 127788, United Arab Emirates

<sup>b</sup>Department of Chemistry, Khalifa University of Science and Technology, Abu Dhabi, P.O. Box 127788, United Arab Emirates

<sup>d</sup>Department of Chemistry and Guangdong Provincial Key Laboratory of Catalytic Chemistry, Southern University of Science and Technology, Shenzhen 518055, China;

<sup>e</sup>King Fahd University of Petroleum and Minerals, School of Chemical and Materials Center for Refining and Advanced Chemicals (CRAC) at the Research and Innovation

<sup>e</sup>Department of Chemistry, Mirpur University of Science and Technology (MUST), Mirpur 10250, AJK, Pakistan

<sup>f</sup>Department of Chemistry and Engineering Research Center of Advanced Rare-Earth Materials of Ministry of Education, Tsinghua University, Beijing 100084, China;

#### Additional Computational Details

A cubic unit cell with a vacuum space of 20 Å contains a phosphotungstic acid (PTA) molecule with transition metal adatoms anchored at the four-fold hollow (4H) site. All the geometry optimization and energy calculation were performed using spin-polarized density functional theory (DFT) methods using the Vienna Ab Initio Simulation Package (VASP).<sup>1-2</sup> To improve the calculation efficiency, the projector augmented wave (PAW) pseudo-potentials are used to define the interaction between the valence and core electrons.<sup>3-4</sup> In this work, the generalized gradient approximation (GGA) using the Perdew, Burke, and Ernzerhof (PBE) exchange-correlation functional was adopted.<sup>5-6</sup> The Kohn-Sham orbitals are expanded by using plane-wave basis sets with an energy cutoff of 400 eV. The geometry optimization was done with a convergence criterion of 10<sup>-5</sup> eV for the total energy. All the ions are permitted to relax until the maximum force is less than 0.02 eV/Å. The Brillouin zone integration was sampled using a 1 x 1 x 1  $\Gamma$  point. A k-point mesh of 3×3×3 was tested for sampling the Brillouin zone and no significant difference was found between the 1 x 1 x 1  $\Gamma$  point sampling.

The Bader charge analysis was performed to compute the electron charge transfer.<sup>7-9</sup> To model the PTA cluster we first constructed a periodic supercell containing 4 x 4 primitive cells (with 12 W atoms, one P atom, and 40 O atoms). By using the standard hydrogen electrode (SHE), the Gibbs free energy change ( $\Delta G$ ) of every elemental step was calculated.

Under standard conditions, HER catalytic property was defined by using the free energy difference of hydrogen adsorption ( $\Delta G_H$ ), which was attained by computing the following equation:

$$\Delta G_H = \Delta E_H + \Delta E_{ZPE} - T\Delta S_H \quad (1)$$

Where  $\Delta E_H$  is the hydrogen adsorption energy,  $\Delta E_{ZPE}$  is the difference between the zero-point energies of the adsorbed hydrogen and gas phase hydrogen, and  $\Delta S_H$  is the entropy difference between the gas phase and adsorbed state. The pressure is 1 atom and temperature  $T = 298$  K. Furthermore, the  $\Delta E_{ZPE}$  and  $T\Delta S_H$  values can be calculated through the vibrational frequencies of the system.

$\Delta E_H$  is defined as the following using the computational hydrogen electrode (CHE) model:

$$\Delta E_H = E_{(\text{catalyst} + \text{H})} - E_{(\text{catalyst})} - 1/2 E_{\text{H}_2} \quad (2)$$

Where  $E_{(\text{catalyst} + \text{H})}$  is the calculated adsorption energies of the  $M_1/\text{PTA}$  system with adsorption of one H atom, and  $E_{(\text{catalyst})}$  represents the energies of the  $M_1/\text{PTA}$  system without adsorption of H. The ideal value of  $\Delta E_H$  is zero, signifying that the better HER performance.

When the pH was fixed to zero, the overall OER could be defined as follows.<sup>10-11</sup>

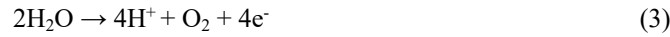

The following are the four-electron reaction steps for OER processes:

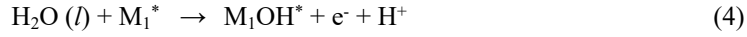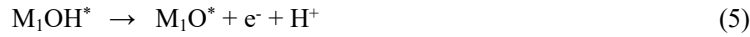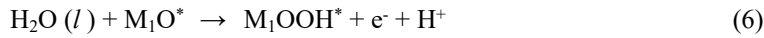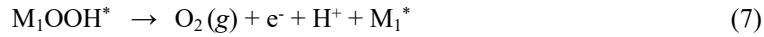

Where  $M_1^*$  refers to the catalyst and active adsorption site on the catalyst; (l) and (g) represent the liquid and gas phases, respectively; and  $\text{OH}^*$ ,  $\text{O}^*$ , and  $\text{OOH}^*$  represent the corresponding adsorbed intermediates.

The ORR processes can be observed as the opposite of OER,<sup>12</sup> and the four key adsorption/desorption steps are written as below:

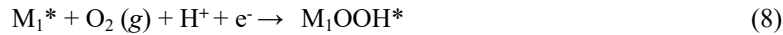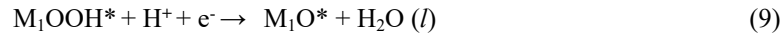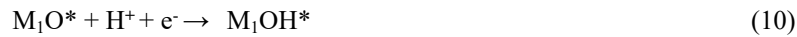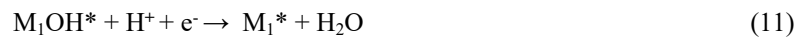

The Gibbs free energy difference for all the above elementary steps ( $\Delta G_{\text{OH}^*}$ ,  $\Delta G_{\text{O}^*}$ ,  $\Delta G_{\text{OOH}^*}$ ) comprises an electron transfer that would be calculated by using the following equations:

$$\Delta G = \Delta E + \Delta ZPE - T\Delta S + \Delta G_U + \Delta G_{\text{pH}} \quad (12)$$

Where  $\Delta E$ ,  $\Delta ZPE$ , and  $\Delta S$  are the energy difference of adsorption energy, zero-point energy, and entropy, respectively.<sup>13</sup> The adsorption energies of  $\Delta E$  are calculated by using DFT. The  $\Delta ZPE$  and  $T\Delta S$  were calculated by

using DFT and the standard thermodynamic data.  $\Delta G_U = -eU$ , is the free energy change related to the electrode-potential  $U$ .  $\Delta G_{pH} = -kT \ln 10^* pH$ , with  $\Delta G_{pH}$  denoting the Gibbs free energy which is amended by  $H^+$  concentration.

The Gibbs free energy changes of four elementary steps for OER processes can be defined as:  $\Delta G_a = \Delta G_{OH^*}$ ,  $\Delta G_b = \Delta G_{O^*} - \Delta G_{OH^*}$ ,  $\Delta G_c = \Delta G_{OOH^*} - \Delta G_{O^*}$ ,  $\Delta G_d = 4.92 - \Delta G_{OOH^*}$ . For ORR steps:  $\Delta G_1 = \Delta G_{OOH^*} - 4.92$ ,  $\Delta G_2 = \Delta G_{O^*} - \Delta G_{OOH^*}$ ,  $\Delta G_3 = \Delta G_{OH^*} - \Delta G_{O^*}$ ,  $\Delta G_4 = \Delta G_{OH^*}$ .

Under electrode potential  $U = 0$  V, the  $\Delta G$  for all the four elementary steps can be calculated by:

$$i) \quad \Delta G_a = G(HO^*) + G(H^+ + e^-) - G(H_2O) - G(^*)$$

$$\text{Or} \quad \Delta G_a = G(HO^*) + 1/2G(H_2) - G(H_2O) - G(^*) \\ = (E_{OH^*} + ZPE_{OH^*} - TS_{OH^*}) + 1/2(E_{H_2} + ZPE_{H_2} - TS_{H_2}) - (E_{H_2O} + ZPE_{H_2O} - TS_{H_2O}) - E^*$$

$$ii) \quad \Delta G_b = G(O^*) + G(H^+ + e^-) - G(OH^*)$$

$$\text{Or} \quad \Delta G_b = G(O^*) + G(H_2) - G(OH^*) \\ = (E_{O^*} + ZPE_{O^*} - TS_{O^*}) + 1/2(E_{H_2} + ZPE_{H_2} - TS_{H_2}) - (E_{OH^*} + ZPE_{OH^*} - TS_{OH^*})$$

$$iii) \quad \Delta G_c = G(HOO^*) + G(H^+ + e^-) - G(H_2O) - G(O^*)$$

$$\text{Or} \quad \Delta G_c = G(HOO^*) + 1/2G(H_2) - G(H_2O) - G(O^*) \\ = (E_{OOH^*} + ZPE_{OOH^*} - TS_{OOH^*}) + 1/2(E_{H_2} + ZPE_{H_2} - TS_{H_2}) - (E_{O^*} + ZPE_{O^*} - TS_{O^*})$$

$$iv) \quad \Delta G_d = G(O_2) + G(H^+ + e^-) - G(OOH^*)$$

$$\text{Or} \quad \Delta G_d = \{4.92 + 2G(H_2O) - 2G(H_2)\} + 1/2G(H_2) - G(OOH^*) \\ = \{4.92 + E_{H_2O} + ZPE_{H_2O} - TS_{H_2O}\} - 2\{E_{H_2} + ZPE_{H_2} - TS_{H_2}\} + 1/2\{E_{H_2} + ZPE_{H_2} - TS_{H_2}\} - (E_{OOH^*} + ZPE_{OOH^*} - TS_{OOH^*})$$

$$\text{Or} = 4.92 + 2(E_{H_2O} + ZPE_{H_2O} - TS_{H_2O}) - 3/2(E_{H_2} + ZPE_{H_2} - TS_{H_2}) - (E_{OOH^*} + ZPE_{OOH^*} - TS_{OOH^*})$$

where the asterisk (\*) refers to the catalyst and active adsorption site on the catalyst. Moreover, the error arising from the computing of the triplet  $O_2$  molecule with DFT methods can be corrected by fixing the overall Gibbs reaction energy, with Gibbs free energy of  $O_2$  to the experimental value of 4.92 eV. Hence, an ideal catalyst with overpotential ( $\eta$ ) = 0 V would perfectly allocate the overall change in Gibbs free energy throughout the four elementary OER/ORR steps i.e.,  $\Delta G_{a-d} = 1.23$  eV.

If the  $\Delta G$  value of all the four elementary steps is different, the overpotential ( $\eta$ ) used to further rationalize the catalytic performance of OER and ORR would be calculated by using the following equations:

$$\eta^{OER} = \max \{\Delta G_a, \Delta G_b, \Delta G_c, \Delta G_d\} / e - 1.23 \quad (13)$$

$$\eta^{ORR} = \max \{\Delta G_1, \Delta G_2, \Delta G_3, \Delta G_4\} / e + 1.23 \quad (14)$$

## Volcano Curve

In the volcano curve, the Gibbs free energies of hydrogen adsorption ( $\Delta G_{H^*}$ ) over the PTA cluster with a hydrogen coverage of  $\theta = 1$  and PTA cluster with a hydrogen coverage of  $\theta = 1/2$  are used to calculate the exchange current, ( $i_0$ ). To obtain  $\Delta G_{H^*}$ , the equation S2 was rewritten to:

$$\Delta E_H = E_{nH^*} - E_{cat} - \frac{n}{2} E_{H_2} \quad (S15)$$

where the asterisk denotes the catalyst.  $E_{nH^*}$ ,  $E_{(n-1)H^*}$ , and  $E_{H_2}$  represent the total energies of the catalyst with  $n$  adsorbed hydrogen atoms, the catalyst with  $n-1$  adsorbed atomic hydrogen, and the  $H_2$  gas, respectively. The  $i_0$  value is evaluated based on Norskov's theory (see the reference for details). If  $\Delta G_{H^*} \leq 0$ , the following equation is used to calculate the exchange current at pH= 0:

$$i_0 = -ek_0 \frac{1}{1 + \exp(-\Delta G_{H^*}/k_b T)} \quad (S16)$$

For another case if the  $\Delta G_{H^*} > 0$ , the  $i_0$  is calculated by using the following expression at pH= 0:

$$i_0 = -ek_0 \frac{1}{1 + \exp(\Delta G_{H^*}/k_b T)} \quad (S17)$$

where  $k_0$  is the rate constant. As there are no experimental data available,  $k_0$  is set to 1.  $k_B$  is the Boltzmann constant ( $k_B = 1.380\ 649 \times 10^{-23} \text{ J K}^{-1}$ ) and  $T$  is the temperature ( $T=298.15 \text{ K}$ ).

## d-band Center

The value of the d-band center of the embedded single metal atoms over the PTA cluster can be calculated by using the following equation:

$$\varepsilon_d = \frac{\int_{-\infty}^{\infty} n_d(\varepsilon) \varepsilon d\varepsilon}{\int_{-\infty}^{\infty} n_d(\varepsilon) d\varepsilon} \quad (S18)$$

Where the  $n_d$  denotes the d states of the single metal atoms ( $M_1$ ) embedded in the PTA cluster. The d-band center of the  $M_1$  atoms, which are closely associated with the catalytic activity and can be calculated by the above-mentioned equation.

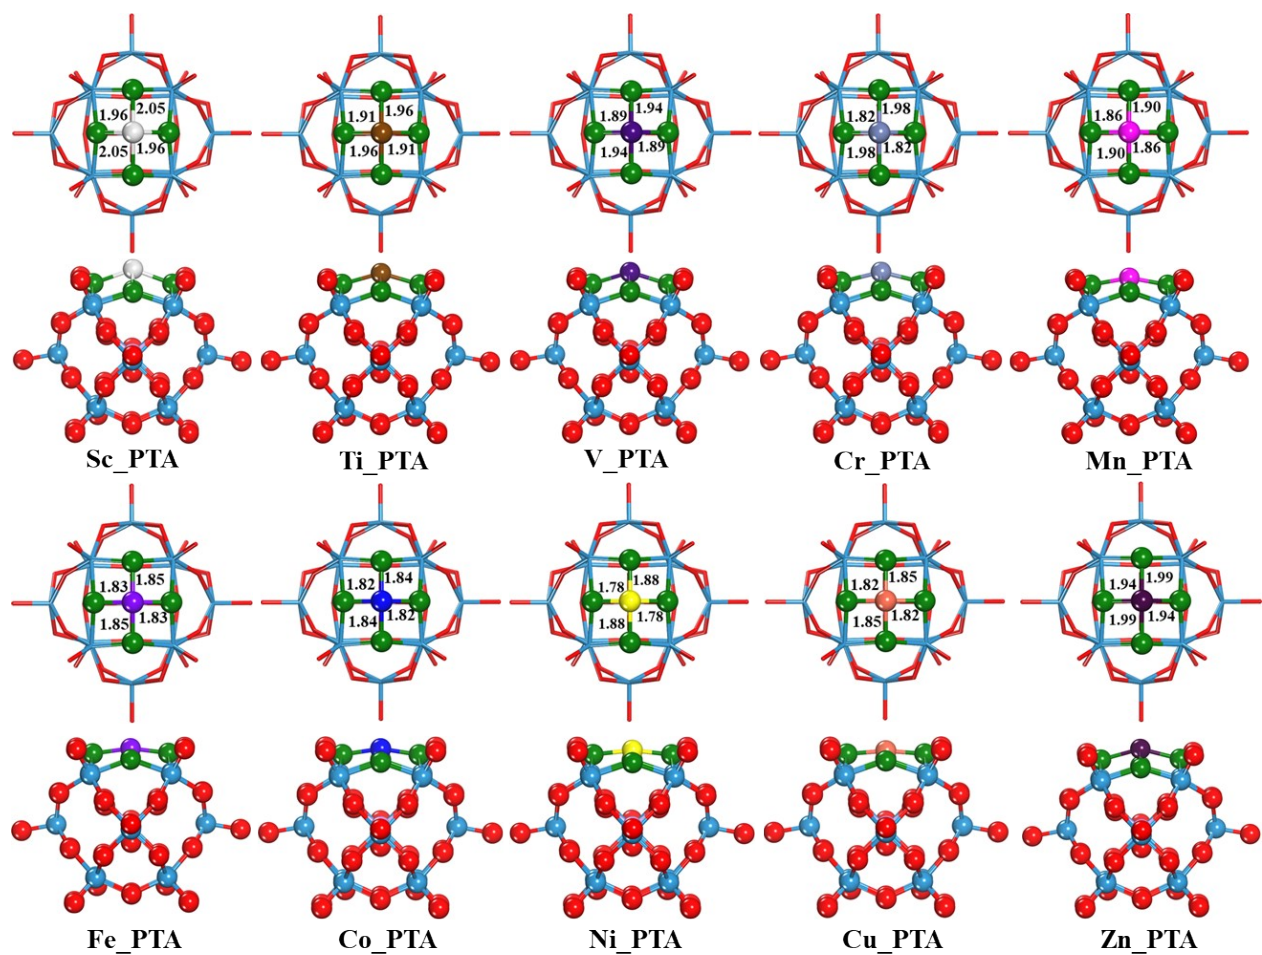

**Fig. S1.** Top and side views of the optimized configuration of 3d transition metal atoms (Sc<sub>1</sub>, Ti<sub>1</sub>, V<sub>1</sub>, Cr<sub>1</sub>, Mn<sub>1</sub>, Fe<sub>1</sub>, Co<sub>1</sub>, Ni<sub>1</sub>, Cu<sub>1</sub>, and Zn<sub>1</sub>) attached on the PTA support. All the bond lengths are given in Å.

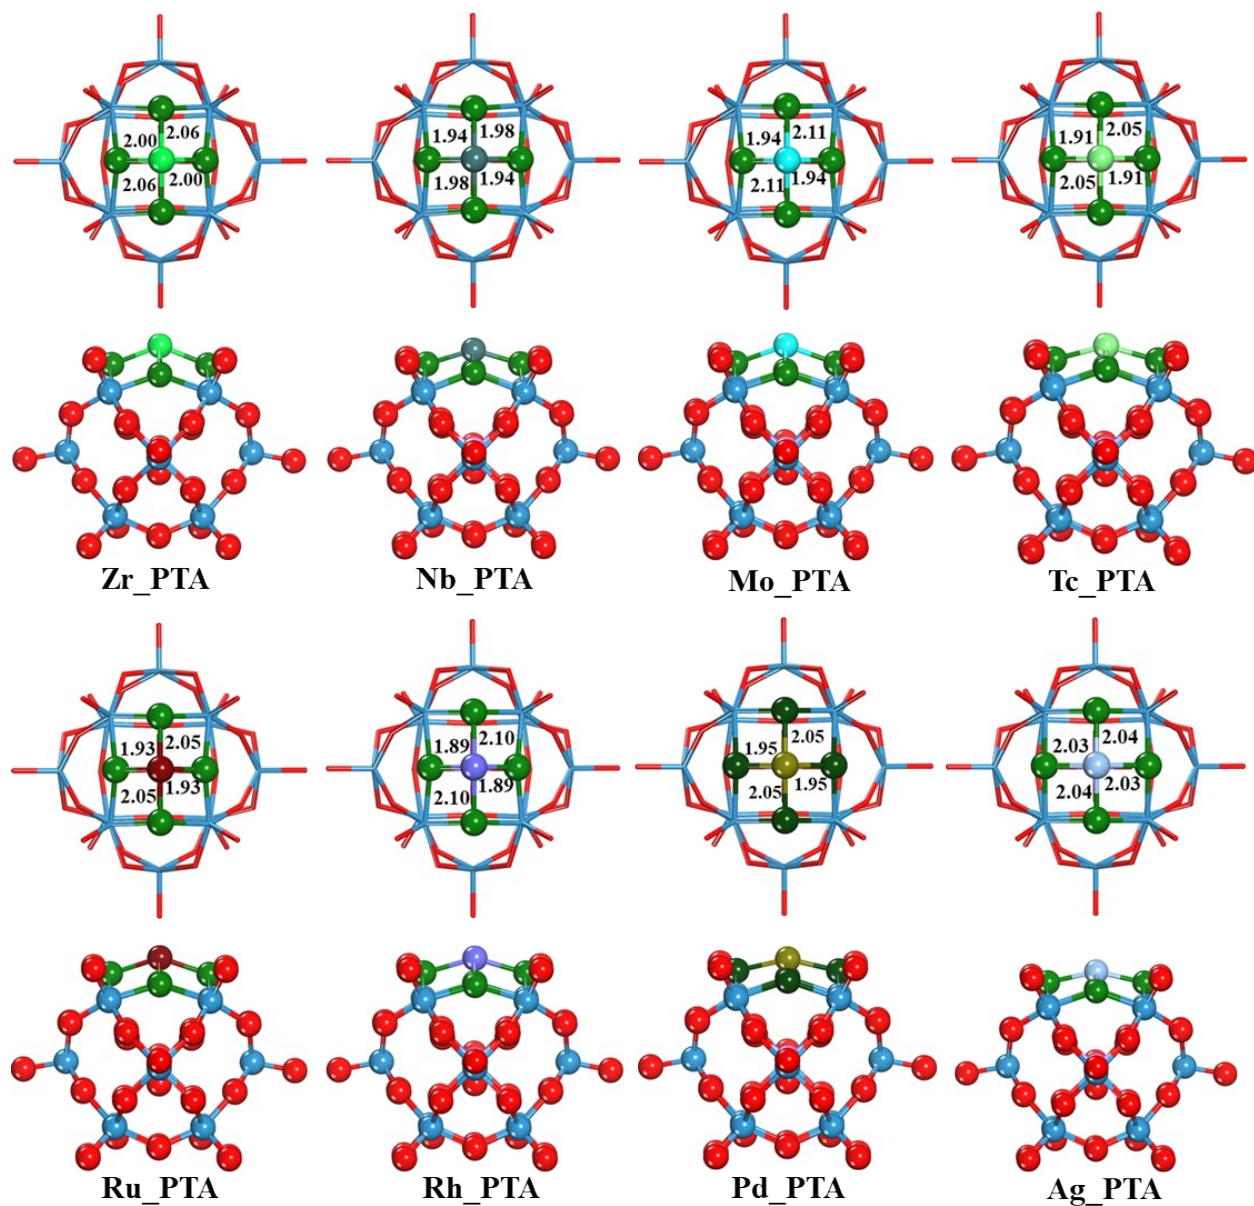

**Fig. S2.** Top and side views of the optimized configuration of 4d transition metal atoms (Zr<sub>1</sub>, Nb<sub>1</sub>, Mo<sub>1</sub>, Tc<sub>1</sub>, Ru<sub>1</sub>, Rh<sub>1</sub>, Pd<sub>1</sub>, and Ag<sub>1</sub>) attached on the PTA support. All the bond lengths are given in Å.

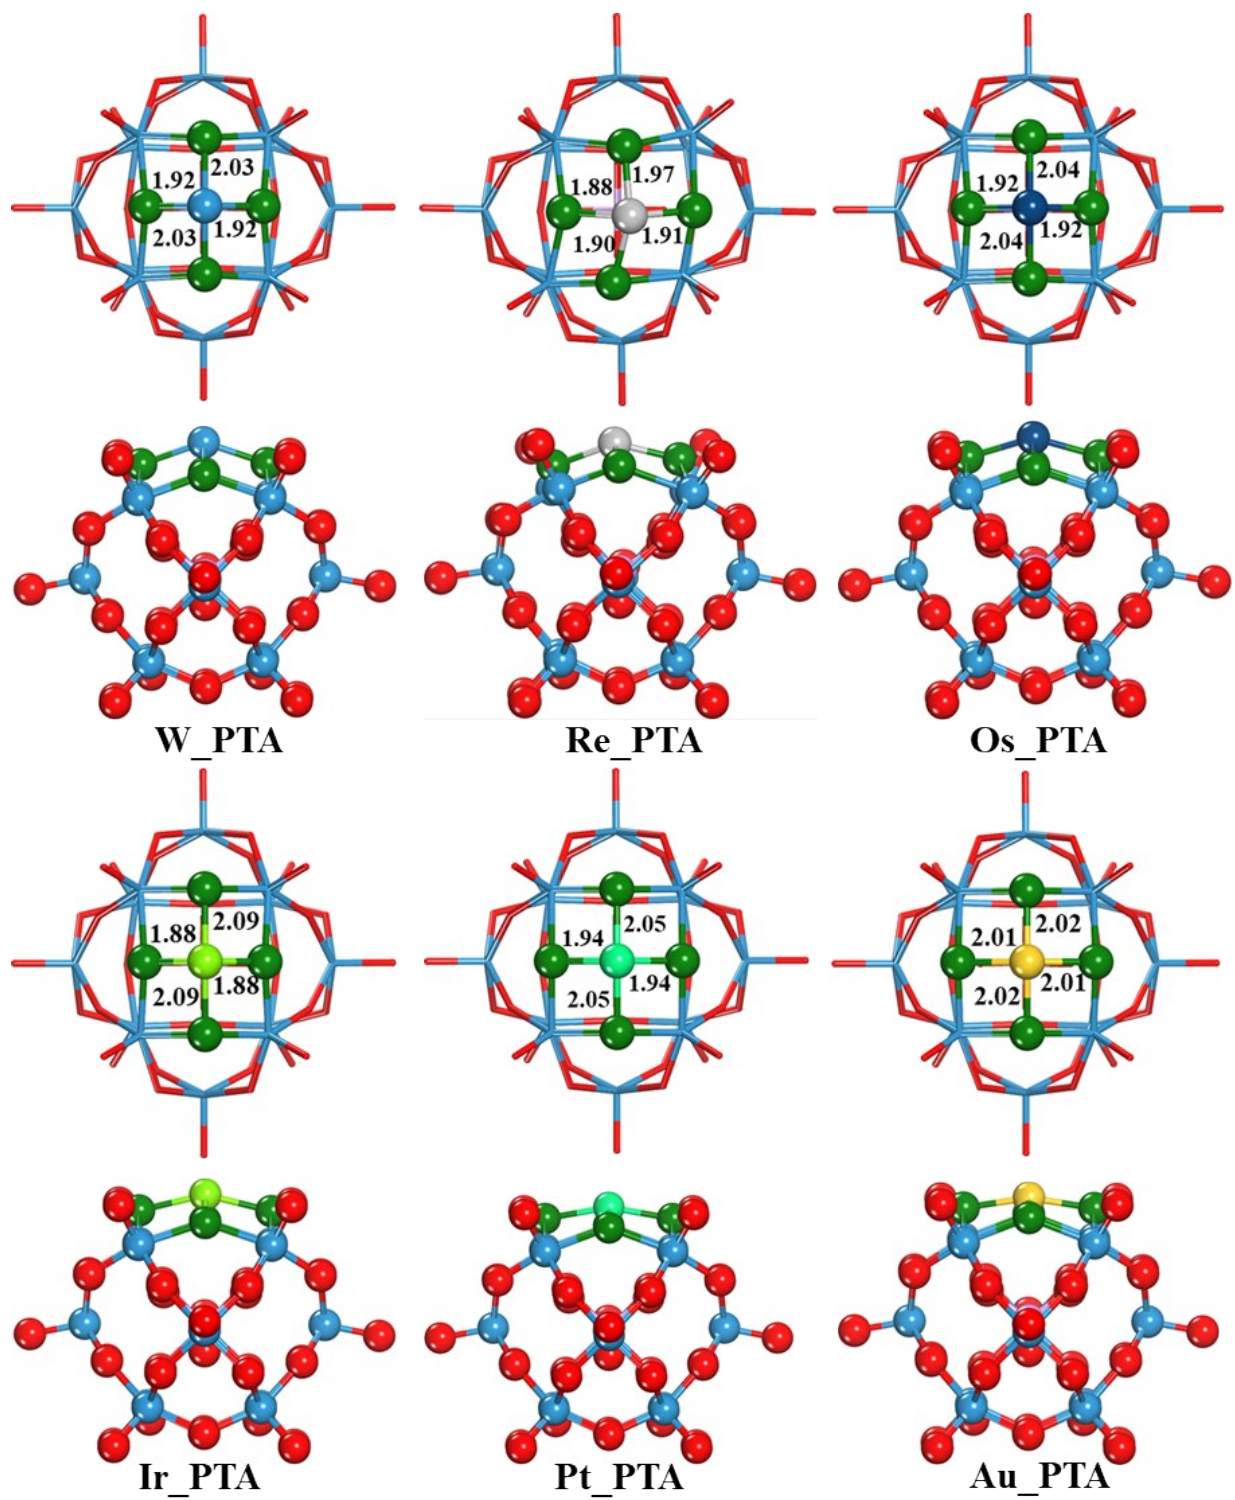

**Fig S3.** Top and side views of the optimized configuration of 5d transition metal atoms (W<sub>1</sub>, Re<sub>1</sub>, Os<sub>1</sub>, Ir<sub>1</sub>, Pt<sub>1</sub>, and Au<sub>1</sub>) attached to the PTA support. All the bond lengths are given in Å.

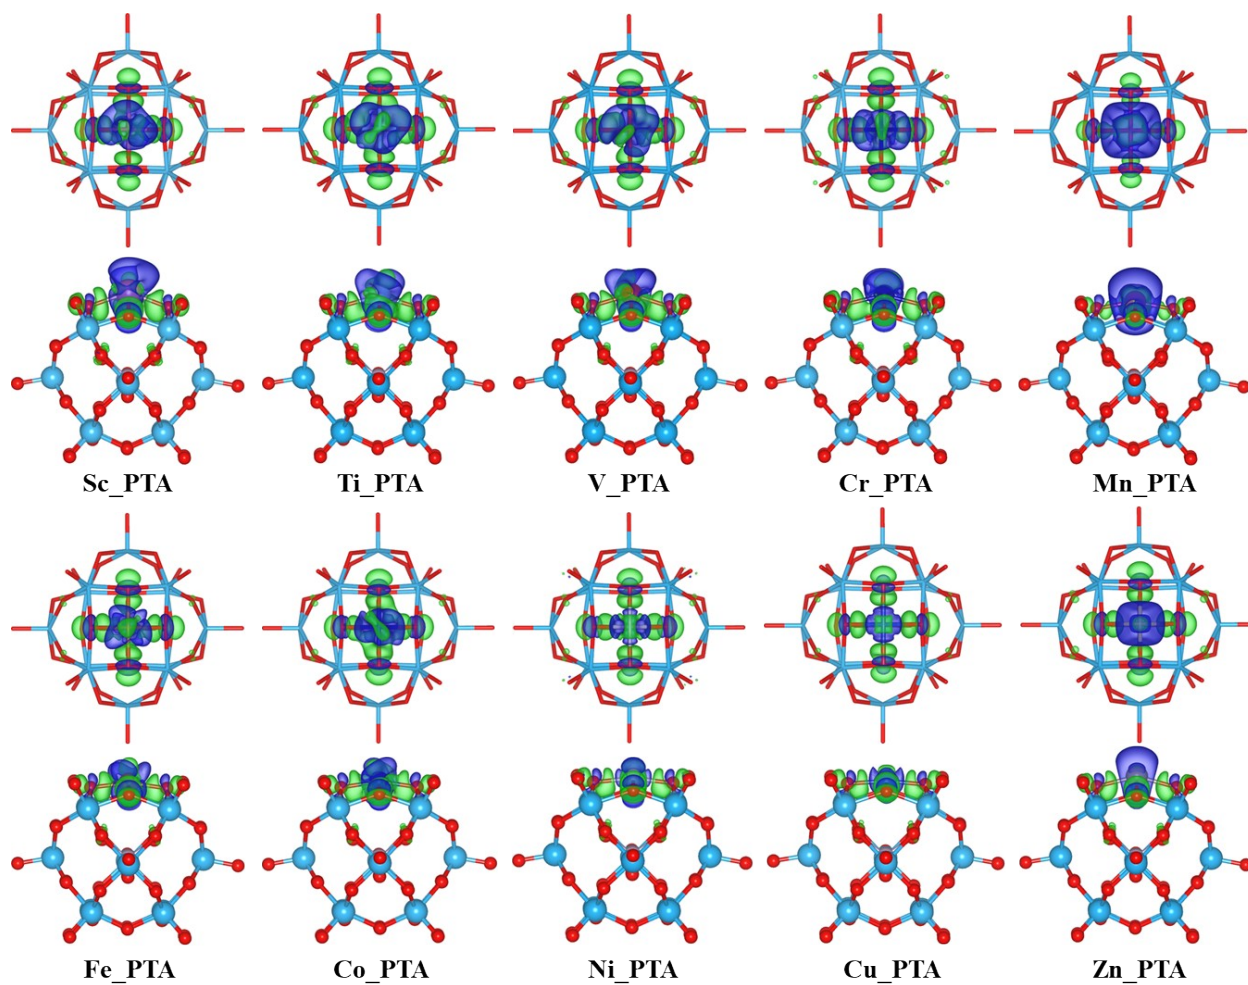

**Fig S4.** Top and side view of partial electron density differences (PEDD) of 3d transition metal atoms ( $\text{Sc}_1$ ,  $\text{Ti}_1$ ,  $\text{V}_1$ ,  $\text{Cr}_1$ ,  $\text{Mn}_1$ ,  $\text{Fe}_1$ ,  $\text{Co}_1$ ,  $\text{Ni}_1$ ,  $\text{Cu}_1$ , and  $\text{Zn}_1$ ) attached on the PTA support. For the contour plots, the charge accumulation regions are rendered in Green while the charge depletion regions are shown in blue. The contour value of the electron difference density is  $\pm 0.005$  a.u.



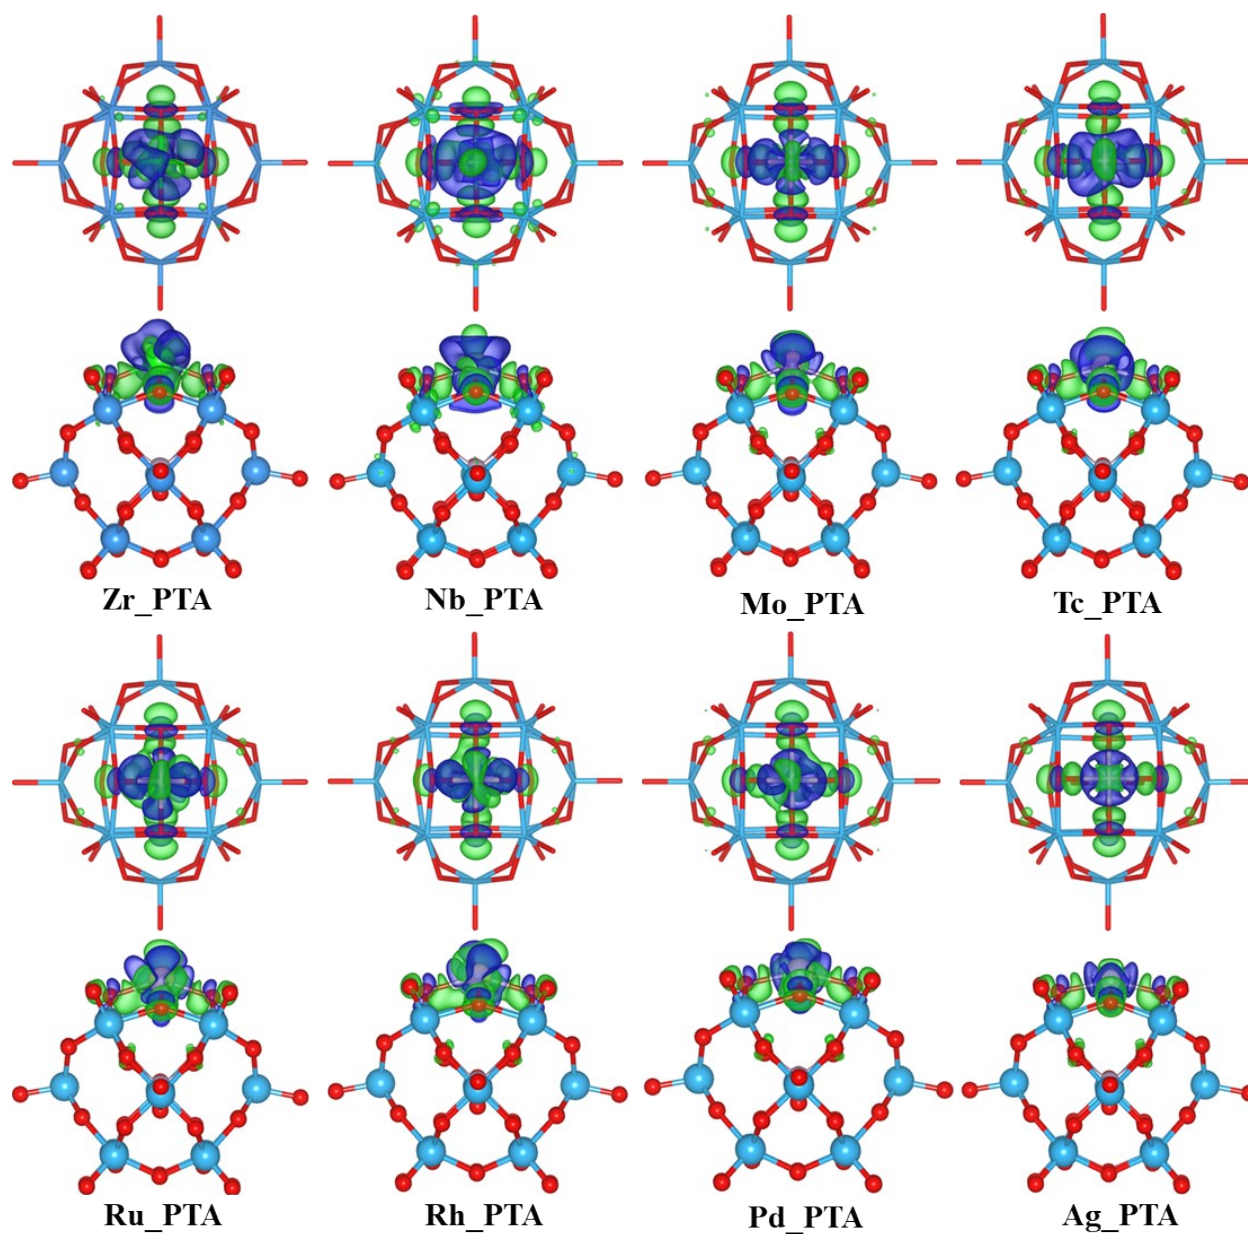

**Fig S5.** Top and side view of partial electron density differences (PEDD) of 4d transition metal atoms ( $Zr_1$ ,  $Nb_1$ ,  $Mo_1$ ,  $Tc_1$ ,  $Ru_1$ ,  $Rh_1$ ,  $Pd_1$ , and  $Ag_1$ ) attached on the PTA support. For the contour plots, the charge accumulation regions are rendered in green while the charge depletion regions are shown in blue. The contour value of the electron difference density is  $\pm 0.005$  a.u.

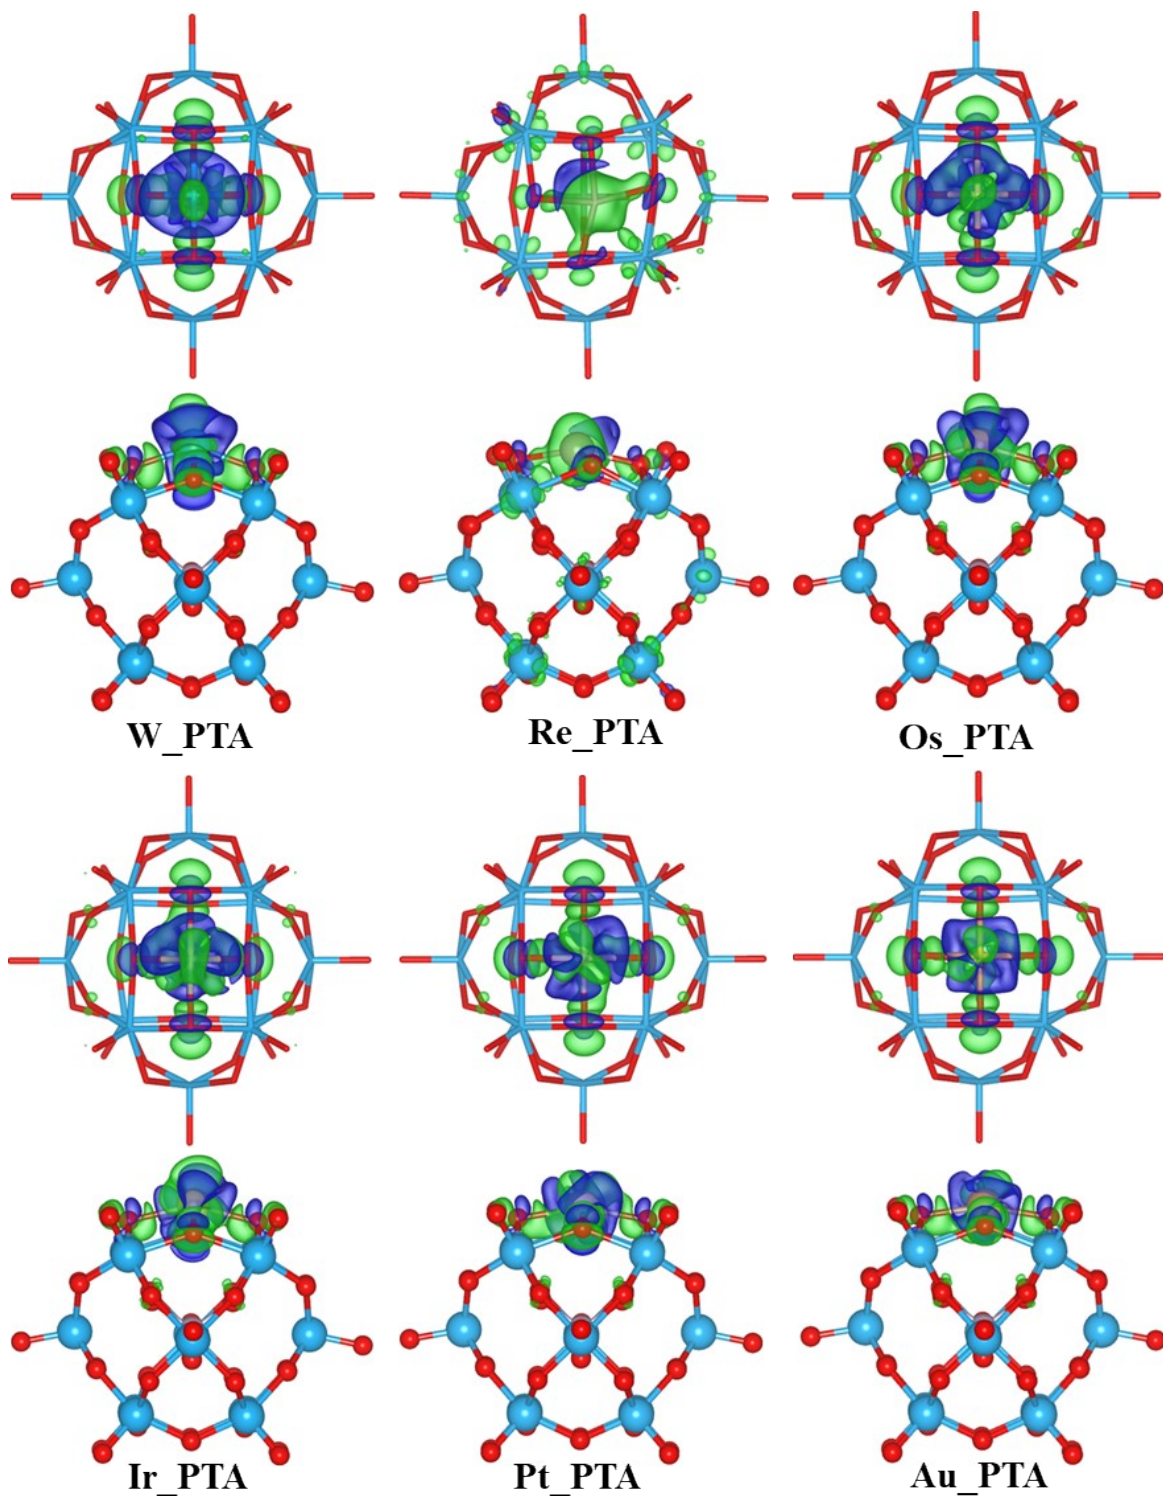

**Fig. S6.** Top and side view of partial electron density differences (PEDD) of 5d transition metal atoms ( $W_1$ ,  $Re_1$ ,  $Os_1$ ,  $Ir_1$ ,  $Pt_1$ , and  $Au_1$ ) attached on the PTA support. For the contour plots, the charge accumulation regions are rendered in green while the charge depletion regions are shown in blue. The contour value of the electron difference density is  $\pm 0.005$  a.u.

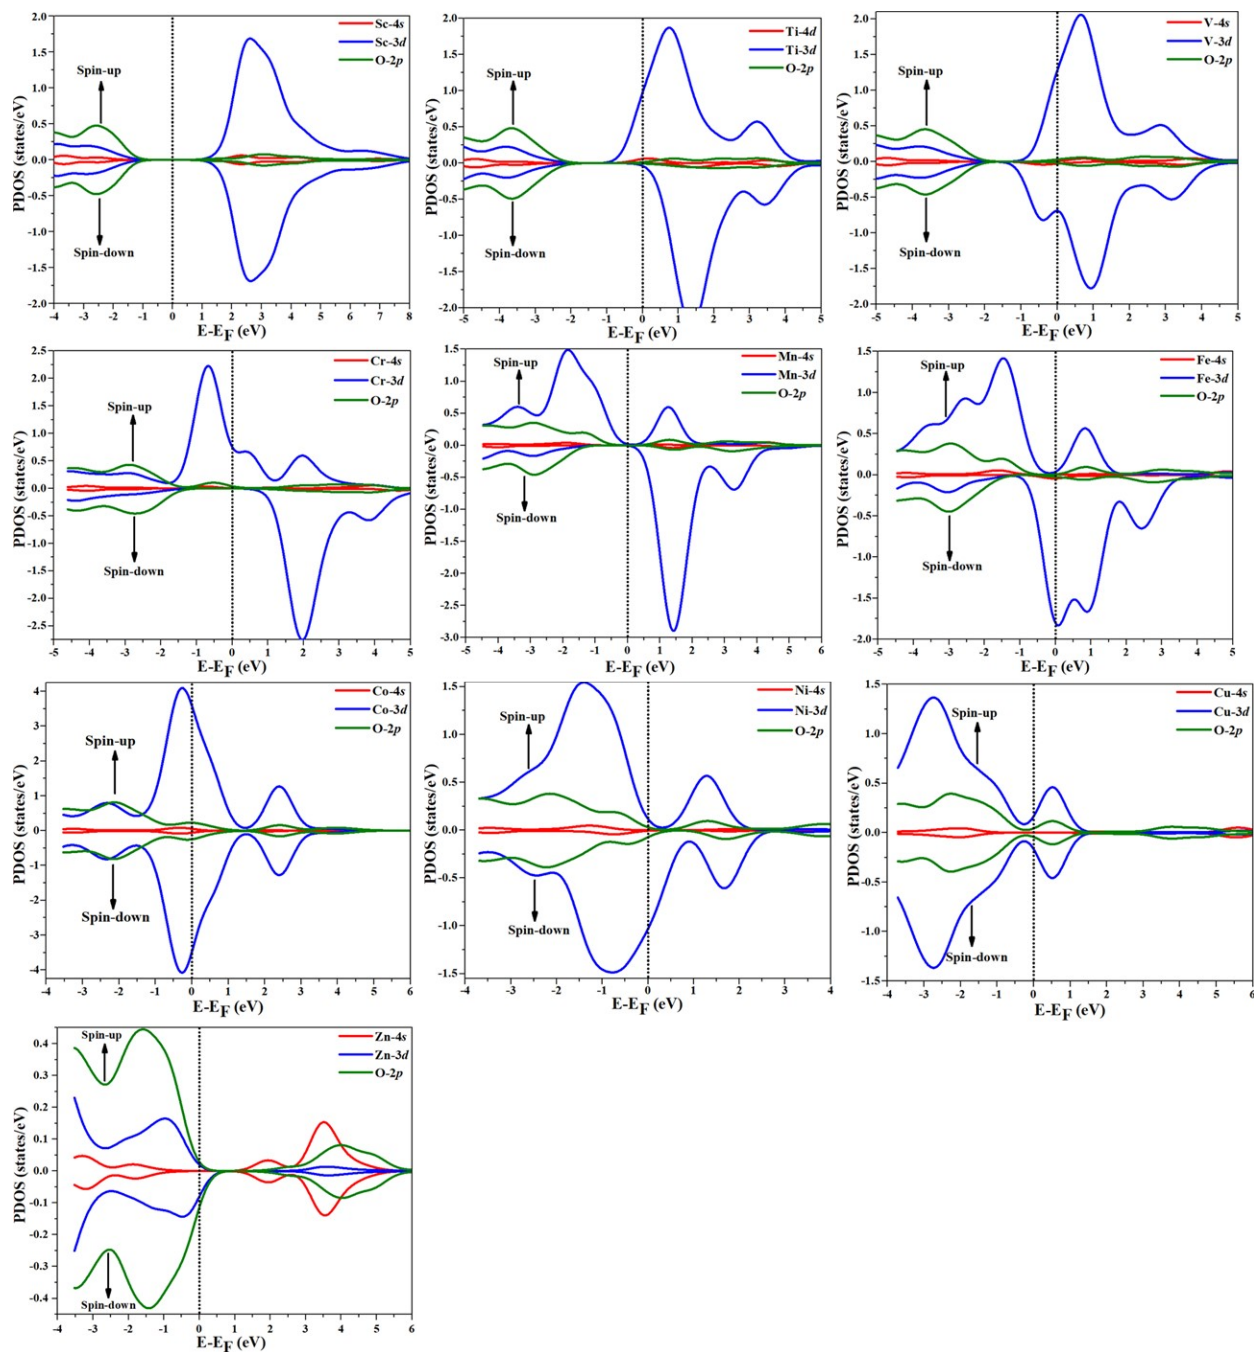

**Fig. S7.** The spin-polarized partial density of states (PDOS) of 3d transition metal atoms ( $\text{Sc}_1$ ,  $\text{Ti}_1$ ,  $\text{V}_1$ ,  $\text{Cr}_1$ ,  $\text{Mn}_1$ ,  $\text{Fe}_1$ ,  $\text{Co}_1$ ,  $\text{Ni}_1$ ,  $\text{Cu}_1$ , and  $\text{Zn}_1$ ) attached to the PTA support. PDOS projected on  $M_1$ -3d (blue) and  $M_1$ -4s (red) and O-2p (olive) states. The Fermi level is fixed at zero.

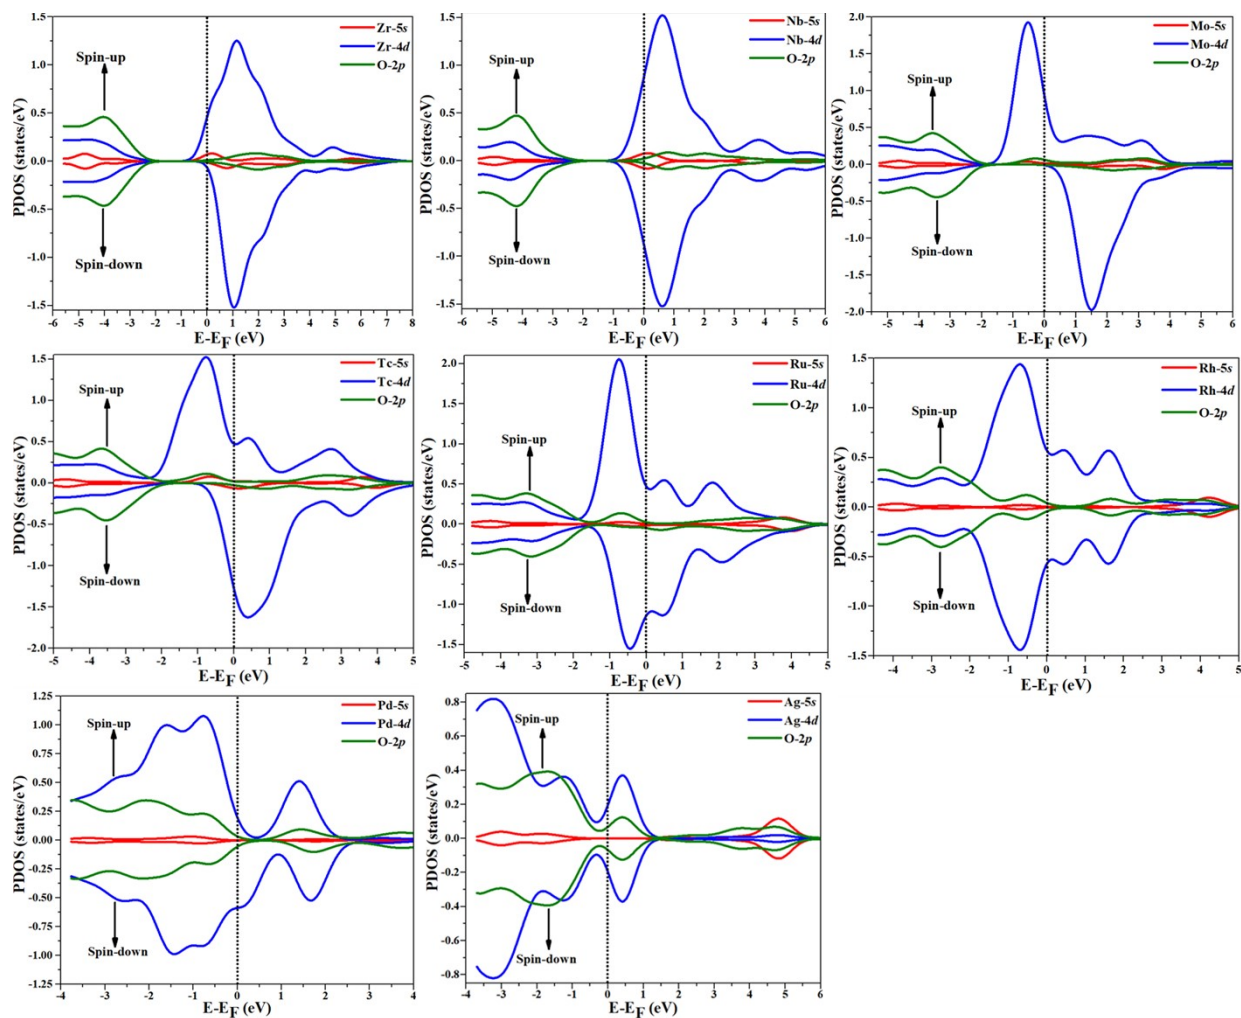

**Fig. S8.** The spin-polarized partial density of states (PDOS) of 4d transition metal atoms ( $Zr_1$ ,  $Nb_1$ ,  $Mo_1$ ,  $Tc_1$ ,  $Ru_1$ ,  $Rh_1$ ,  $Pd_1$ , and  $Ag_1$ ) attached to the PTA support. PDOS projected on  $M_1$ -4d (blue) and  $M_1$ -5s (red) and O-2p (olive) states. The Fermi level is fixed at zero.

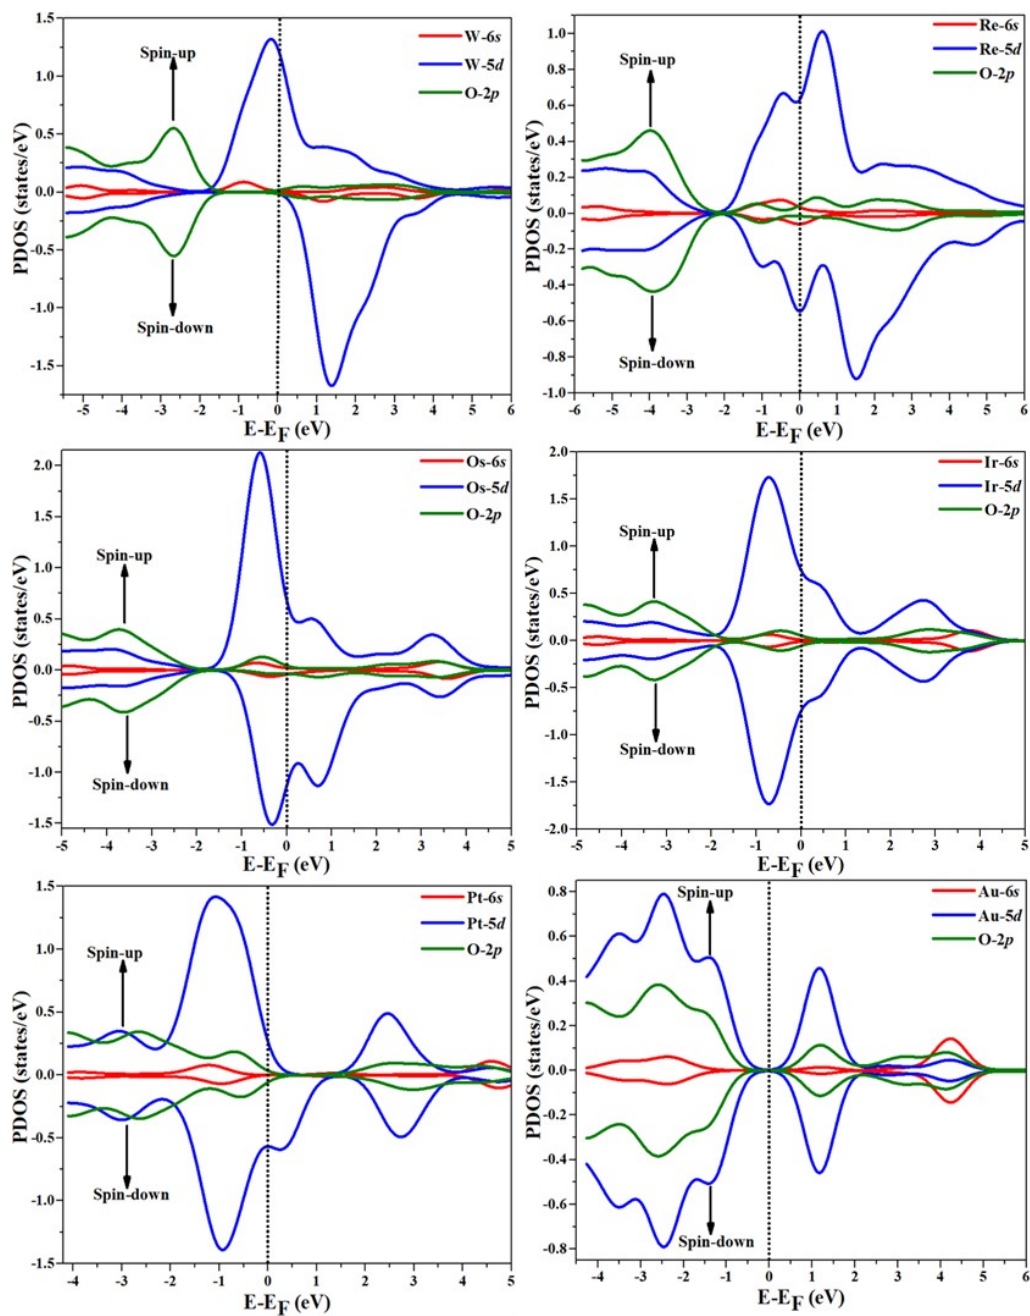

**Fig. S9.** The spin-polarized partial density of states (PDOS) of 5d transition metal atoms ( $W_1$ ,  $Re_1$ ,  $Os_1$ ,  $Ir_1$ ,  $Pt_1$ , and  $Au_1$ ) attached to the PTA support. PDOS projected on  $M_1$ -5d (blue) and  $M_1$ -6s (red) and O-2p (olive) states. The Fermi level is fixed at zero.

**Table S1.** The binding sites, calculated binding energies (eV), average bond lengths between the metal atoms and neighboring oxygen atoms (Å), and Bader charges [ $q(e^-)$ ] of transition metal atoms (3d = Sc<sub>1</sub>, Ti<sub>1</sub>, V<sub>1</sub>, Cr<sub>1</sub>, Mn<sub>1</sub>, Fe<sub>1</sub>, Co<sub>1</sub>, Ni<sub>1</sub>, Cu<sub>1</sub>, Zn<sub>1</sub>; 4d = Zr<sub>1</sub>, Nb<sub>1</sub>, Mo<sub>1</sub>, Tc<sub>1</sub>, Ru<sub>1</sub>, Rh<sub>1</sub>, Pd<sub>1</sub>, Ag<sub>1</sub>; 5d = W<sub>1</sub>, Re<sub>1</sub>, Os<sub>1</sub>, Ir<sub>1</sub>, Pt<sub>1</sub>, Au<sub>1</sub>) anchored on the PTA support.

| <b>Systems</b>       | <b>Binding Site</b> | <b><math>E_{\text{bin}}/\text{eV}</math></b> | <b>Average Bond Length (Å)</b> | <b><math>q</math> (e)</b> |
|----------------------|---------------------|----------------------------------------------|--------------------------------|---------------------------|
| Sc <sub>1</sub> /PTA | 4H-site             | -10.54                                       | 2.01                           | 1.79                      |
| Ti <sub>1</sub> /PTA | 4H-site             | -8.45                                        | 1.94                           | 1.64                      |
| V <sub>1</sub> /PTA  | 4H-site             | -7.17                                        | 1.92                           | 1.50                      |
| Cr <sub>1</sub> /PTA | 4H-site             | -6.69                                        | 1.90                           | 1.47                      |
| Mn <sub>1</sub> /PTA | 4H-site             | -6.41                                        | 1.88                           | 1.39                      |
| Fe <sub>1</sub> /PTA | 4H-site             | -5.13                                        | 1.84                           | 0.84                      |
| Co <sub>1</sub> /PTA | 4H-site             | -4.36                                        | 1.83                           | 0.88                      |
| Ni <sub>1</sub> /PTA | 4H-site             | -3.99                                        | 1.83                           | 0.92                      |
| Cu <sub>1</sub> /PTA | 4H-site             | -3.37                                        | 1.84                           | 0.79                      |
| Zn <sub>1</sub> /PTA | 4H-site             | -4.11                                        | 1.97                           | 0.90                      |
| Zr <sub>1</sub> /PTA | 4H-site             | -8.59                                        | 2.03                           | 2.05                      |
| Nb <sub>1</sub> /PTA | 4H-site             | -5.78                                        | 1.96                           | 1.89                      |
| Mo <sub>1</sub> /PTA | 4H-site             | -4.70                                        | 2.03                           | 1.77                      |
| Tc <sub>1</sub> /PTA | 4H-site             | -3.19                                        | 1.98                           | 1.54                      |
| Ru <sub>1</sub> /PTA | 4H-site             | -2.50                                        | 1.99                           | 1.49                      |
| Rh <sub>1</sub> /PTA | 4H-site             | -2.45                                        | 2.00                           | 0.95                      |
| Pd <sub>1</sub> /PTA | 4H-site             | -2.09                                        | 2.00                           | 1.06                      |
| Ag <sub>1</sub> /PTA | 4H-site             | -1.59                                        | 2.04                           | 0.74                      |
| W <sub>1</sub> /PTA  | 4H-site             | -3.80                                        | 1.98                           | 3.49                      |
| Re <sub>1</sub> /PTA | 4H-site             | -2.56                                        | 1.92                           | 1.80                      |
| Os <sub>1</sub> /PTA | 4H-site             | -1.31                                        | 1.98                           | 1.23                      |
| Ir <sub>1</sub> /PTA | 4H-site             | -1.44                                        | 1.98                           | 0.52                      |
| Pt <sub>1</sub> /PTA | 4H-site             | -1.67                                        | 1.99                           | 0.61                      |
| Au <sub>1</sub> /PTA | 4H-site             | -1.36                                        | 2.02                           | 0.54                      |

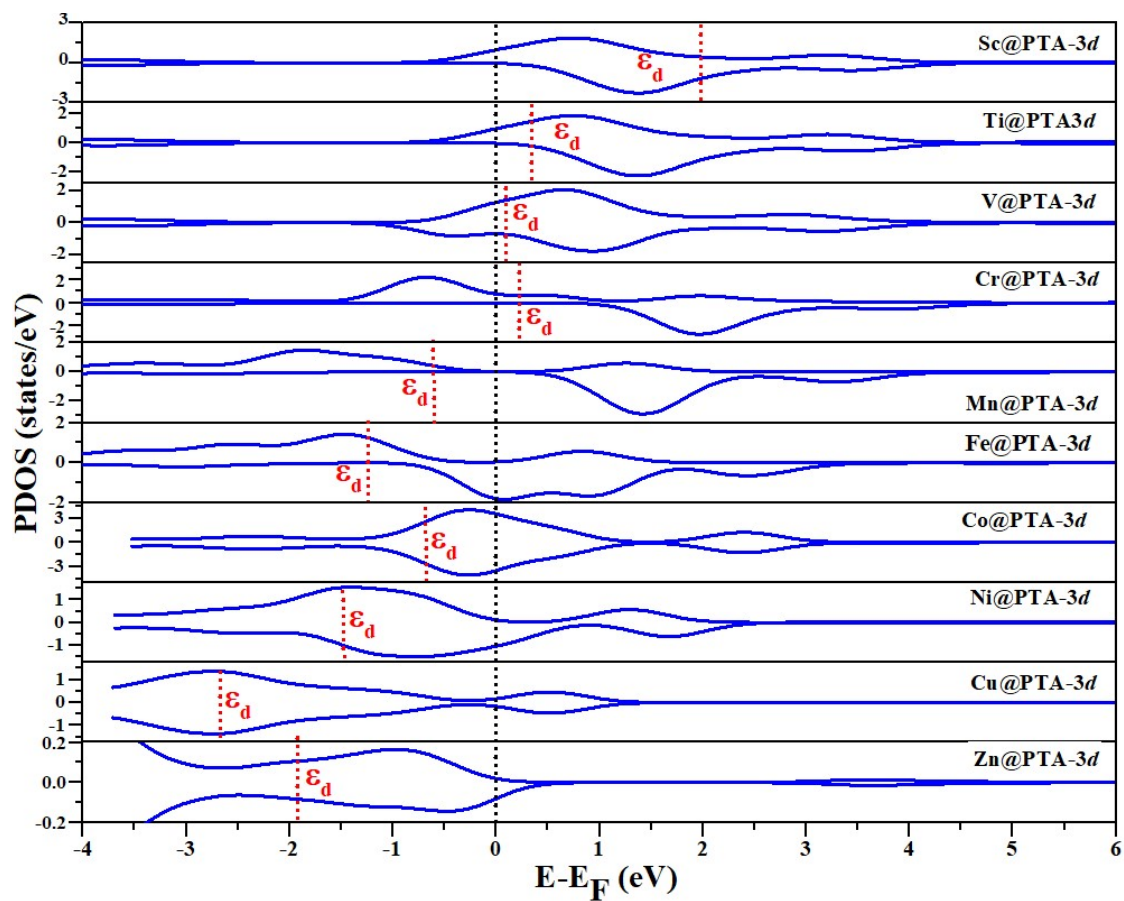

**Fig. S10.** Calculated spin-polarized partial density of states (PDOS) of the d-band of the 3d transition metal atoms ( $\text{Sc}_1$ ,  $\text{Ti}_1$ ,  $\text{V}_1$ ,  $\text{Cr}_1$ ,  $\text{Mn}_1$ ,  $\text{Fe}_1$ ,  $\text{Co}_1$ ,  $\text{Ni}_1$ ,  $\text{Cu}_1$ , and  $\text{Zn}_1$ ) attached on the PTA support. PDOS proposed on  $\text{M}_1$ -3d (blue) states. The Fermi level is fixed at the zero of energy and the d-band center ( $\epsilon_d$ ) is marked by the red dashed line.

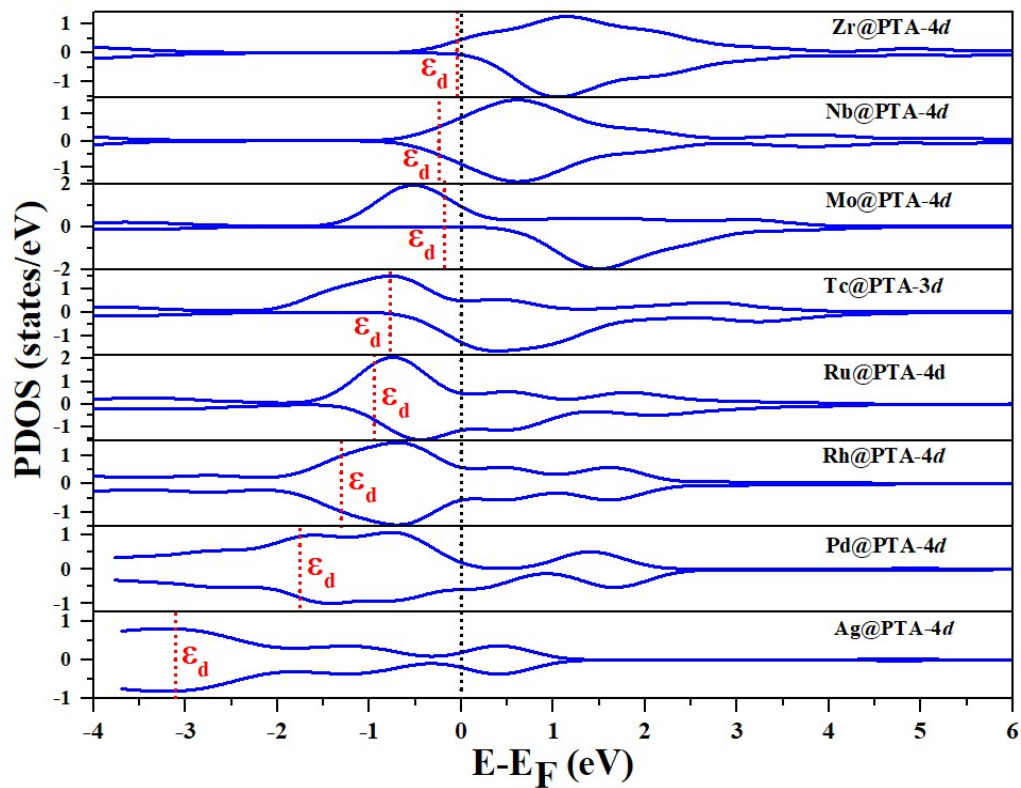

**Fig. S11.** Calculated spin-polarized partial density of states (PDOS) of the d-band of the 4d transition metal atoms ( $Zr_l$ ,  $Nb_l$ ,  $Mo_l$ ,  $Tc_l$ ,  $Ru_l$ ,  $Rh_l$ ,  $Pd_l$ , and  $Ag_l$ ) attached on the PTA support. PDOS projected on  $M_{l-4d}$  (blue) states. The Fermi level is fixed at the zero of energy and the d-band center ( $\epsilon_d$ ) is marked by the red dashed line.



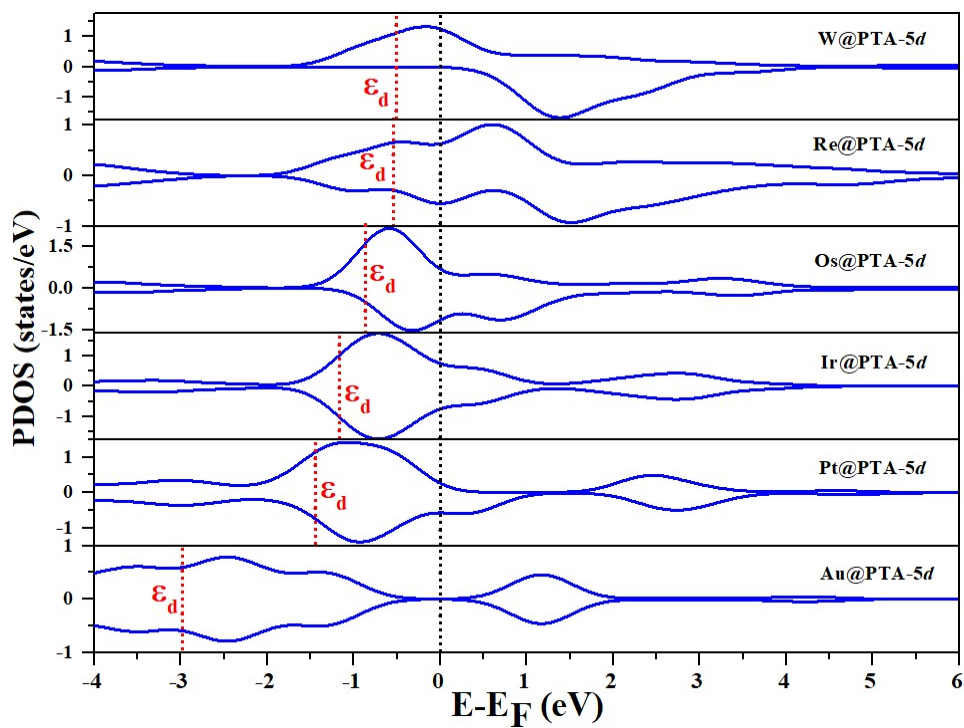

**Fig. S12.** Calculated spin-polarized partial density of states (PDOS) of the d-band of the 5d transition metal atoms ( $W_1$ ,  $Re_1$ ,  $Os_1$ ,  $Ir_1$ ,  $Pt_1$ , and  $Au_1$ ) attached on the PTA support. PDOS proposed on  $M_1$ -5d (blue) states. The Fermi level is fixed at the zero of energy and the d-band center ( $\epsilon_d$ ) is marked by the red dashed line.

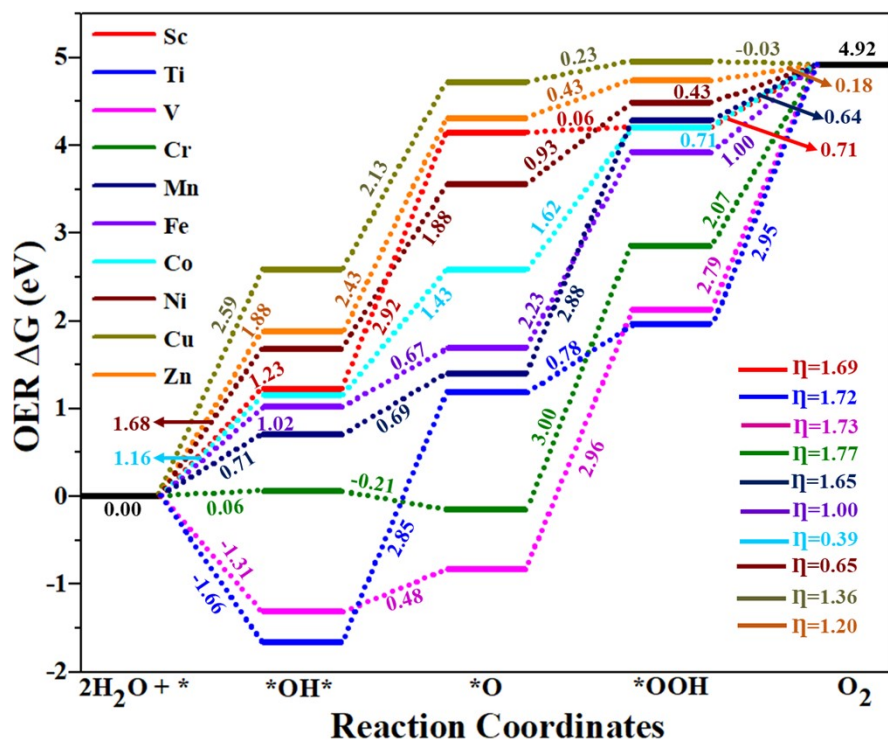

**Fig. S13.** Calculated free energy diagram for the OER over 3d M<sub>1</sub>/PTA (M<sub>1</sub>= Sc<sub>1</sub>, Ti<sub>1</sub>, V<sub>1</sub>, Cr<sub>1</sub>, Mn<sub>1</sub>, Fe<sub>1</sub>, Co<sub>1</sub>, Ni<sub>1</sub>, Cu<sub>1</sub>, and Zn<sub>1</sub>) cluster under U= 0 V and the corresponding changes of free energies and theoretical overpotential (η).

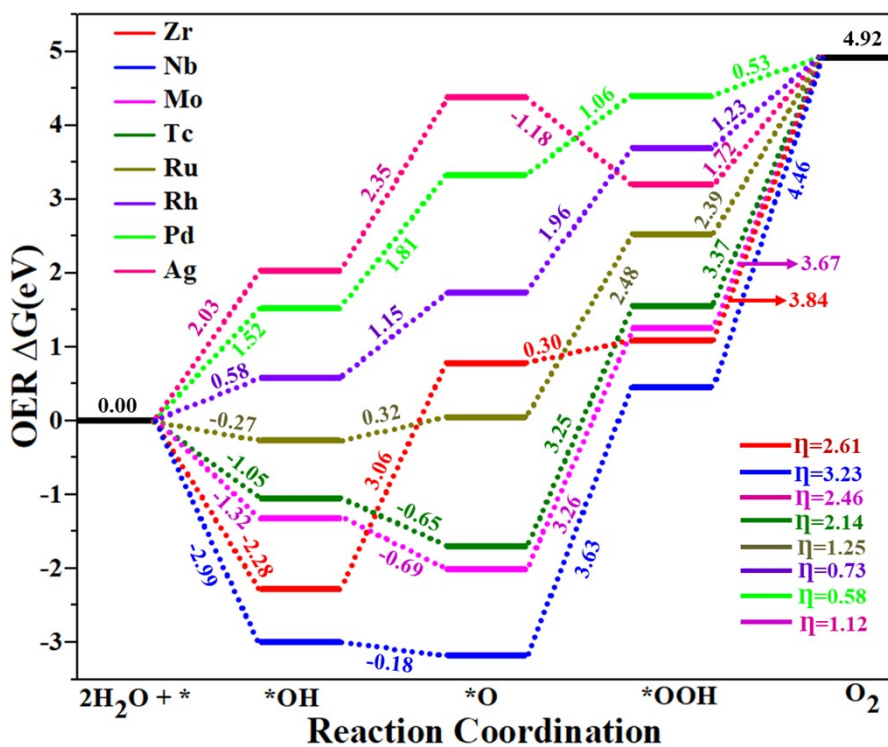

**Fig. S14.** Calculated free energy diagram for the OER over 4d M<sub>1</sub>/PTA (Zr<sub>1</sub>, Nb<sub>1</sub>, Mo<sub>1</sub>, Tc<sub>1</sub>, Ru<sub>1</sub>, Rh<sub>1</sub>, Pd<sub>1</sub>, and Ag<sub>1</sub>) cluster under U= 0 V and the corresponding changes of free energies and theoretical overpotential (η).

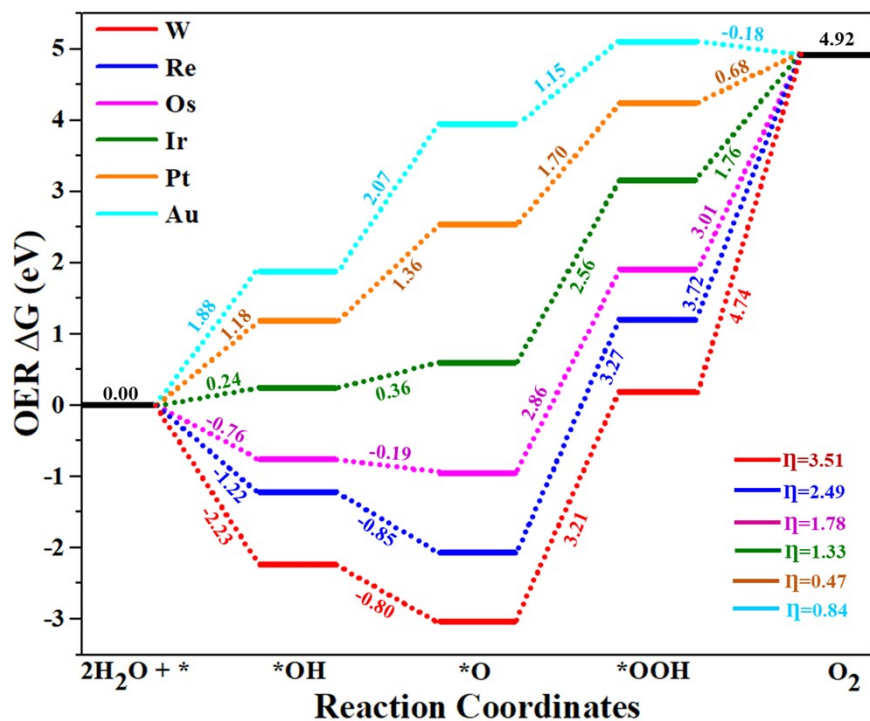

**Fig. S15.** Calculated free energy diagram for the OER over 5d  $M_1$ /PTA ( $M_1 = W_1, Re_1, Os_1, Ir_1, Pt_1, Au_1$ ) cluster under  $U = 0$  V and the corresponding changes of free energies and theoretical overpotential ( $\eta$ ).

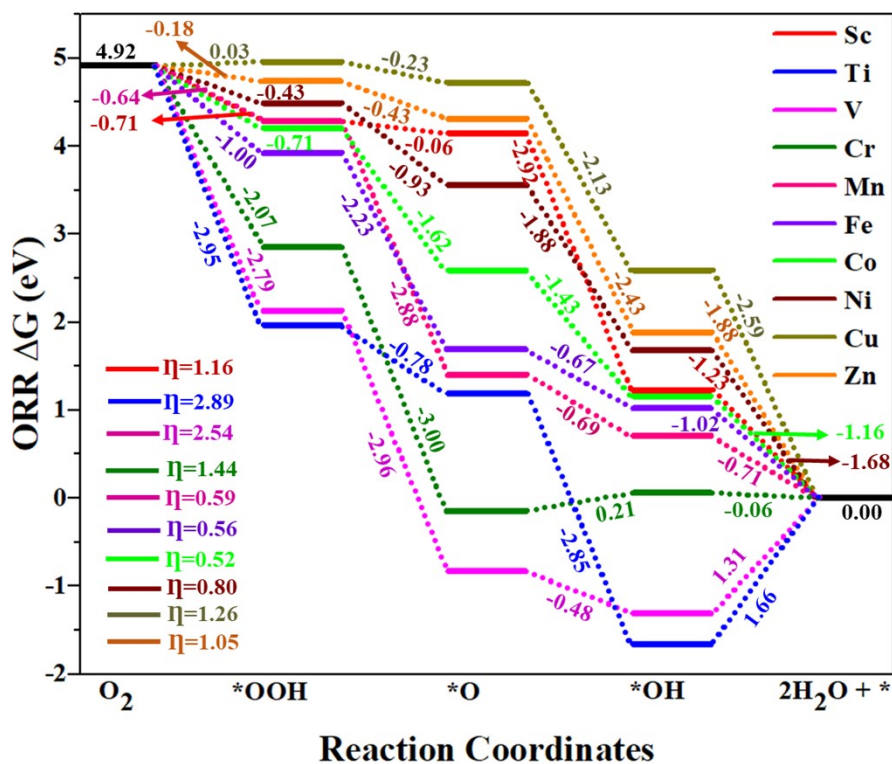

**Fig. S16.** Calculated free energy diagram for the ORR over 3d  $M_1$ /PTA ( $M_1 = Sc_1, Ti_1, V_1, Cr_1, Mn_1, Fe_1, Co_1, Ni_1, Cu_1, Zn_1$ ) cluster under  $U = 0$  V and the corresponding changes of free energies and theoretical overpotential ( $\eta$ ).

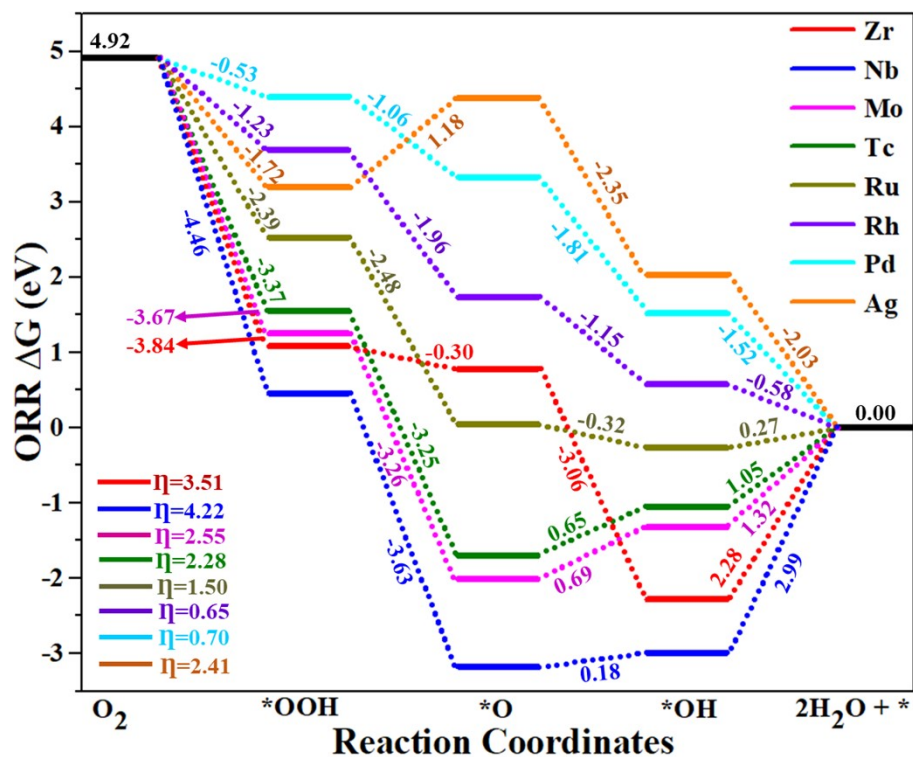

**Fig. S17.** Calculated free energy diagram for the ORR over 4d M<sub>1</sub>/PTA (Zr<sub>1</sub>, Nb<sub>1</sub>, Mo<sub>1</sub>, Tc<sub>1</sub>, Ru<sub>1</sub>, Rh<sub>1</sub>, Pd<sub>1</sub>, and Ag<sub>1</sub>) support under U= 0 V and the corresponding changes of free energies and theoretical overpotential ( $\eta$ ).

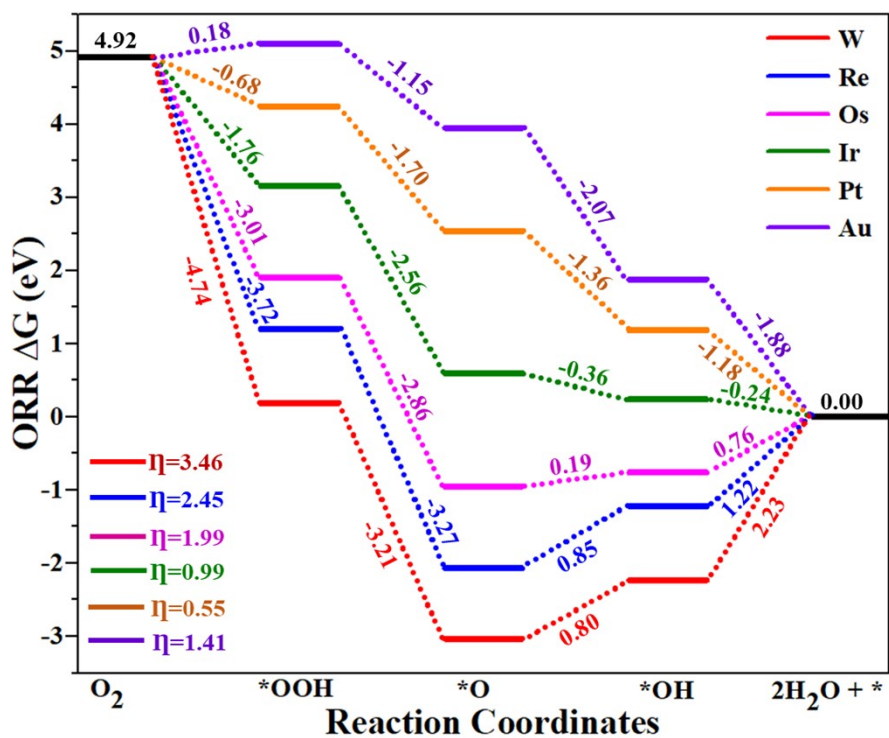

**Fig. S18.** Calculated free energy diagram for the ORR over 5d M<sub>1</sub>/PTA (M<sub>1</sub>= W<sub>1</sub>, Re<sub>1</sub>, Os<sub>1</sub>, Ir<sub>1</sub>, Pt<sub>1</sub>, and Au<sub>1</sub>) support under U= 0 V and the corresponding changes of free energies and theoretical overpotential ( $\eta$ ).

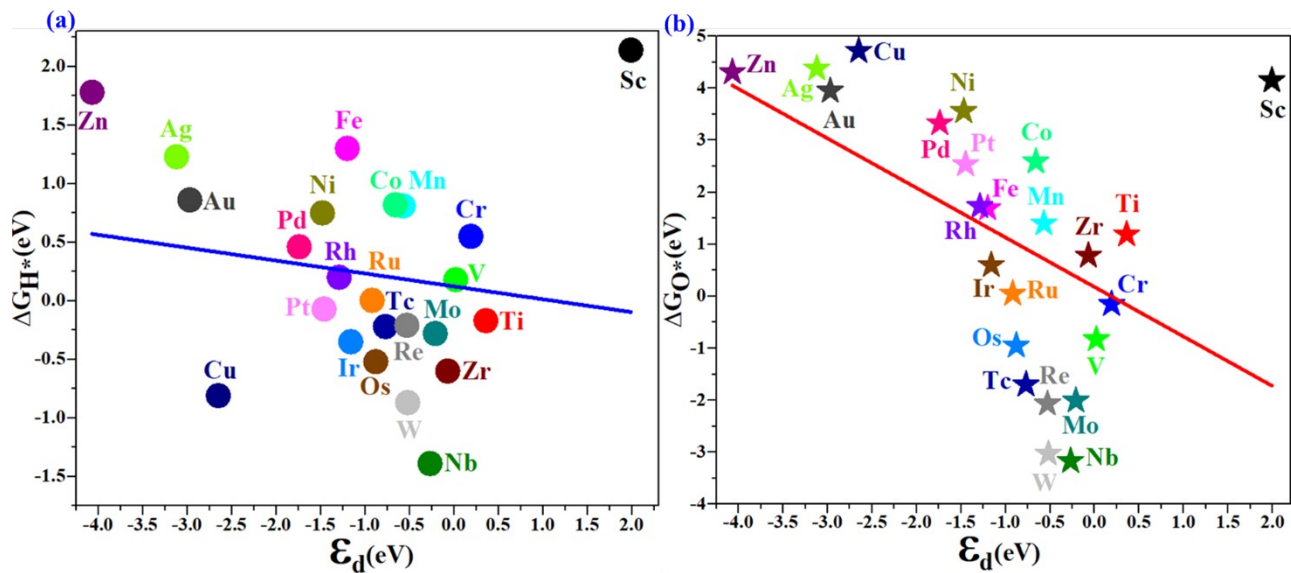

**Fig. S19.** (a) Scaling relationship between the d-band centers and Gibbs free energy of adsorbed hydrogen atom ( $\Delta G_{H^*}$ ) (b) Scaling relationship among the d-band centers of adsorbed transition metal and  $\Delta G_{O^*}$  intermediates for the  $M_1$ /PTA catalysts.

**Table S2.** The calculated total adsorption energy of H\* intermediates ( $E_{H^*}$ ), Gibbs free energy of hydrogen adsorption ( $\Delta G_{H^*}$ ), and d-band center of transition metal atoms over the surface of  $M_1/PTA$  ( $M_1 = Sc_1, Ti_1, V_1, Cr_1, Mn_1, Fe_1, Co_1, Ni_1, Cu_1, Zn_1, Zr_1, Nb_1, Mo_1, Tc_1, Ru_1, Rh_1, Pd_1, Ag_1, W_1, Re_1, Os_1, Ir_1, Pt_1,$  and  $Au_1,$ ) catalysts. The unit for energy is eV.

| Systems              | $E_{H^*}$  | $\Delta G_{H^*}$ | $\epsilon_d$ |
|----------------------|------------|------------------|--------------|
| Sc <sub>1</sub> /PTA | -481.76517 | 2.14             | 1.99         |
| Ti <sub>1</sub> /PTA | -483.70976 | -0.17            | 0.36         |
| V <sub>1</sub> /PTA  | -483.07164 | 0.181            | 0.02         |
| Cr <sub>1</sub> /PTA | -482.61658 | 0.55             | 0.19         |
| Mn <sub>1</sub> /PTA | -481.87768 | 0.81             | -0.57        |
| Fe <sub>1</sub> /PTA | -479.31548 | 1.30             | -1.20        |
| Co <sub>1</sub> /PTA | -477.93277 | 0.82             | -0.66        |
| Ni <sub>1</sub> /PTA | -476.08253 | 0.75             | -1.48        |
| Cu <sub>1</sub> /PTA | -475.43861 | -0.81            | -2.65        |
| Zn <sub>1</sub> /PTA | -470.78417 | 1.78             | -4.07        |
| Zr <sub>1</sub> /PTA | -484.97416 | -0.60            | -0.07        |
| Nb <sub>1</sub> /PTA | -484.4743  | -1.39            | -0.27        |
| Mo <sub>1</sub> /PTA | -482.87575 | -0.28            | -0.21        |
| Tc <sub>1</sub> /PTA | -480.86017 | -0.22            | -0.77        |
| Ru <sub>1</sub> /PTA | -479.02016 | 0.004            | -0.92        |
| Rh <sub>1</sub> /PTA | -476.86409 | 0.20             | -1.29        |
| Pd <sub>1</sub> /PTA | -474.2702  | 0.46             | -1.74        |
| Ag <sub>1</sub> /PTA | -470.48831 | 1.23             | -3.12        |
| W <sub>1</sub> /PTA  | -484.62251 | -0.87            | -0.52        |
| Re <sub>1</sub> /PTA | -482.49357 | -0.21            | -0.53        |
| Os <sub>1</sub> /PTA | -480.3419  | -0.52            | -0.88        |
| Ir <sub>1</sub> /PTA | -477.99489 | -0.35            | -1.16        |
| Pt <sub>1</sub> /PTA | -475.29499 | -0.08            | -1.46        |
| Au <sub>1</sub> /PTA | -471.16318 | 0.86             | -2.97        |

**Table S3.** The calculated adsorption energy of reaction intermediates ( $E_{\text{OH}^*}$ ,  $E_{\text{O}^*}$ ,  $E_{\text{OOH}^*}$ ) at the 4H site over  $M_1/\text{PTA}$  ( $M_1 = \text{Sc}_1, \text{Ti}_1, \text{V}_1, \text{Cr}_1, \text{Mn}_1, \text{Fe}_1, \text{Co}_1, \text{Ni}_1, \text{Cu}_1, \text{Zn}_1, \text{Zr}_1, \text{Nb}_1, \text{Mo}_1, \text{Tc}_1, \text{Ru}_1, \text{Rh}_1, \text{Pd}_1, \text{Ag}_1, \text{W}_1, \text{Re}_1, \text{Os}_1, \text{Ir}_1, \text{Pt}_1, \text{and Au}_1$ .) catalysts. The unit for energy is eV.

| Systems              | $E_{\text{OH}^*}$ | $E_{\text{O}^*}$ | $E_{\text{OOH}^*}$ |
|----------------------|-------------------|------------------|--------------------|
| Sc <sub>1</sub> /PTA | -490.35588        | -483.70829       | -494.87952         |
| Ti <sub>1</sub> /PTA | -492.729          | -486.17378       | -496.56709         |
| V <sub>1</sub> /PTA  | -492.08923        | -487.95165       | -496.18375         |
| Cr <sub>1</sub> /PTA | -490.68065        | -487.19302       | -495.33524         |
| Mn <sub>1</sub> /PTA | -489.54795        | -485.17938       | -493.42825         |
| Fe <sub>1</sub> /PTA | -487.19929        | -482.78759       | -491.73249         |
| Co <sub>1</sub> /PTA | -485.11145        | -480.03665       | -489.63737         |
| Ni <sub>1</sub> /PTA | -482.72394        | -477.10468       | -487.36846         |
| Cu <sub>1</sub> /PTA | -479.43587        | -473.57956       | -484.50508         |
| Zn <sub>1</sub> /PTA | -478.31714        | -472.12123       | -482.94735         |
| Zr <sub>1</sub> /PTA | -494.16442        | -487.42093       | -498.35973         |
| Nb <sub>1</sub> /PTA | -493.59162        | -490.10639       | -497.66666         |
| Mo <sub>1</sub> /PTA | -491.48022        | -488.48045       | -496.29198         |
| Tc <sub>1</sub> /PTA | -498.27524        | -486.22012       | -493.99407         |
| Ru <sub>1</sub> /PTA | -486.8929         | -482.83101       | -491.52801         |
| Rh <sub>1</sub> /PTA | -484.11494        | -479.25087       | -488.45811         |
| Pd <sub>1</sub> /PTA | -480.75502        | -475.20716       | -485.34550         |
| Ag <sub>1</sub> /PTA | -477.20781        | -471.09316       | -483.44883         |
| W <sub>1</sub> /PTA  | -493.49747        | -490.63177       | -498.47049         |
| Re <sub>1</sub> /PTA | -491.13786        | -488.25458       | -496.05693         |
| Os <sub>1</sub> /PTA | -488.17133        | -484.60554       | -493.00932         |
| Ir <sub>1</sub> /PTA | -485.02068        | -480.93627       | -489.56164         |
| Pt <sub>1</sub> /PTA | -481.57366        | -476.47658       | -486.00867         |
| Au <sub>1</sub> /PTA | -477.64712        | -471.84598       | -481.82915         |

**Table S4.** Binding energy (E), zero-point energy (ZPE), and entropic correction (TS, T = 298.15K) of the reactants and products. The unit for energy is eV.

| Species          | E       | ZPE    | TS     |
|------------------|---------|--------|--------|
| O <sub>2</sub>   | -9.860  | 0.1057 | 0.6300 |
| H <sub>2</sub> O | -14.216 | 0.5873 | 0.6700 |
| H <sub>2</sub>   | -6.770  | 0.2719 | 0.4000 |

**Table S5.** The zero-point energy (ZPE) of the intermediates adsorbed over M<sub>1</sub>/PTA (M<sub>1</sub> = Sc<sub>1</sub>, Ti<sub>1</sub>, V<sub>1</sub>, Cr<sub>1</sub>, Mn<sub>1</sub>, Fe<sub>1</sub>, Co<sub>1</sub>, Ni<sub>1</sub>, Cu<sub>1</sub>, Zn<sub>1</sub>, Zr<sub>1</sub>, Nb<sub>1</sub>, Mo<sub>1</sub>, Tc<sub>1</sub>, Ru<sub>1</sub>, Rh<sub>1</sub>, Pd<sub>1</sub>, Ag<sub>1</sub>, W<sub>1</sub>, Re<sub>1</sub>, Os<sub>1</sub>, Ir<sub>1</sub>, Pt<sub>1</sub>, and Au<sub>1</sub>) catalysts. Notably, the ZPE of substrates is negligible, and the entropies of adsorbate and substrate are negligible as well.

| <b>Systems</b>       | <b>H*</b> | <b>*OH</b> | <b>*O</b> | <b>*OOH</b> |
|----------------------|-----------|------------|-----------|-------------|
| Sc <sub>1</sub> /PTA | 0.028795  | 0.320496   | 0.030974  | 0.416476    |
| Ti <sub>1</sub> /PTA | 0.170774  | 0.312390   | 0.051672  | 0.421849    |
| V <sub>1</sub> /PTA  | 0.173847  | 0.314059   | 0.082721  | 0.467119    |
| Cr <sub>1</sub> /PTA | 0.171247  | 0.359294   | 0.085284  | 0.423191    |
| Mn <sub>1</sub> /PTA | 0.160211  | 0.342266   | 0.084502  | 0.420497    |
| Fe <sub>1</sub> /PTA | 0.175332  | 0.364781   | 0.078649  | 0.427974    |
| Co <sub>1</sub> /PTA | 0.163899  | 0.320798   | 0.069990  | 0.441757    |
| Ni <sub>1</sub> /PTA | 0.171921  | 0.349254   | 0.053537  | 0.435058    |
| Cu <sub>1</sub> /PTA | 0.167213  | 0.337195   | 0.047307  | 0.418297    |
| Zn <sub>1</sub> /PTA | 0.116921  | 0.325993   | 0.036501  | 0.432259    |
| Zr <sub>1</sub> /PTA | 0.163989  | 0.319086   | 0.048109  | 0.456893    |
| Nb <sub>1</sub> /PTA | 0.185307  | 0.327288   | 0.078428  | 0.441252    |
| Mo <sub>1</sub> /PTA | 0.171811  | 0.339330   | 0.081187  | 0.319674    |
| Tc <sub>1</sub> /PTA | 0.164624  | 0.356655   | 0.084360  | 0.333389    |
| Ru <sub>1</sub> /PTA | 0.173045  | 0.377771   | 0.078268  | 0.430418    |
| Rh <sub>1</sub> /PTA | 0.154813  | 0.361882   | 0.079217  | 0.438795    |
| Pd <sub>1</sub> /PTA | 0.201153  | 0.352712   | 0.059438  | 0.415964    |
| Ag <sub>1</sub> /PTA | 0.192300  | 0.334978   | 0.037266  | 0.385706    |
| W <sub>1</sub> /PTA  | 0.195933  | 0.320286   | 0.082762  | 0.333218    |
| Re <sub>1</sub> /PTA | 0.161848  | 0.375864   | 0.089580  | 0.340221    |
| Os <sub>1</sub> /PTA | 0.182917  | 0.380956   | 0.077183  | 0.401560    |
| Ir <sub>1</sub> /PTA | 0.144938  | 0.376061   | 0.084485  | 0.428110    |
| Pt <sub>1</sub> /PTA | 0.218376  | 0.363328   | 0.069474  | 0.449651    |
| Au <sub>1</sub> /PTA | 0.226586  | 0.352979   | 0.056278  | 0.404807    |



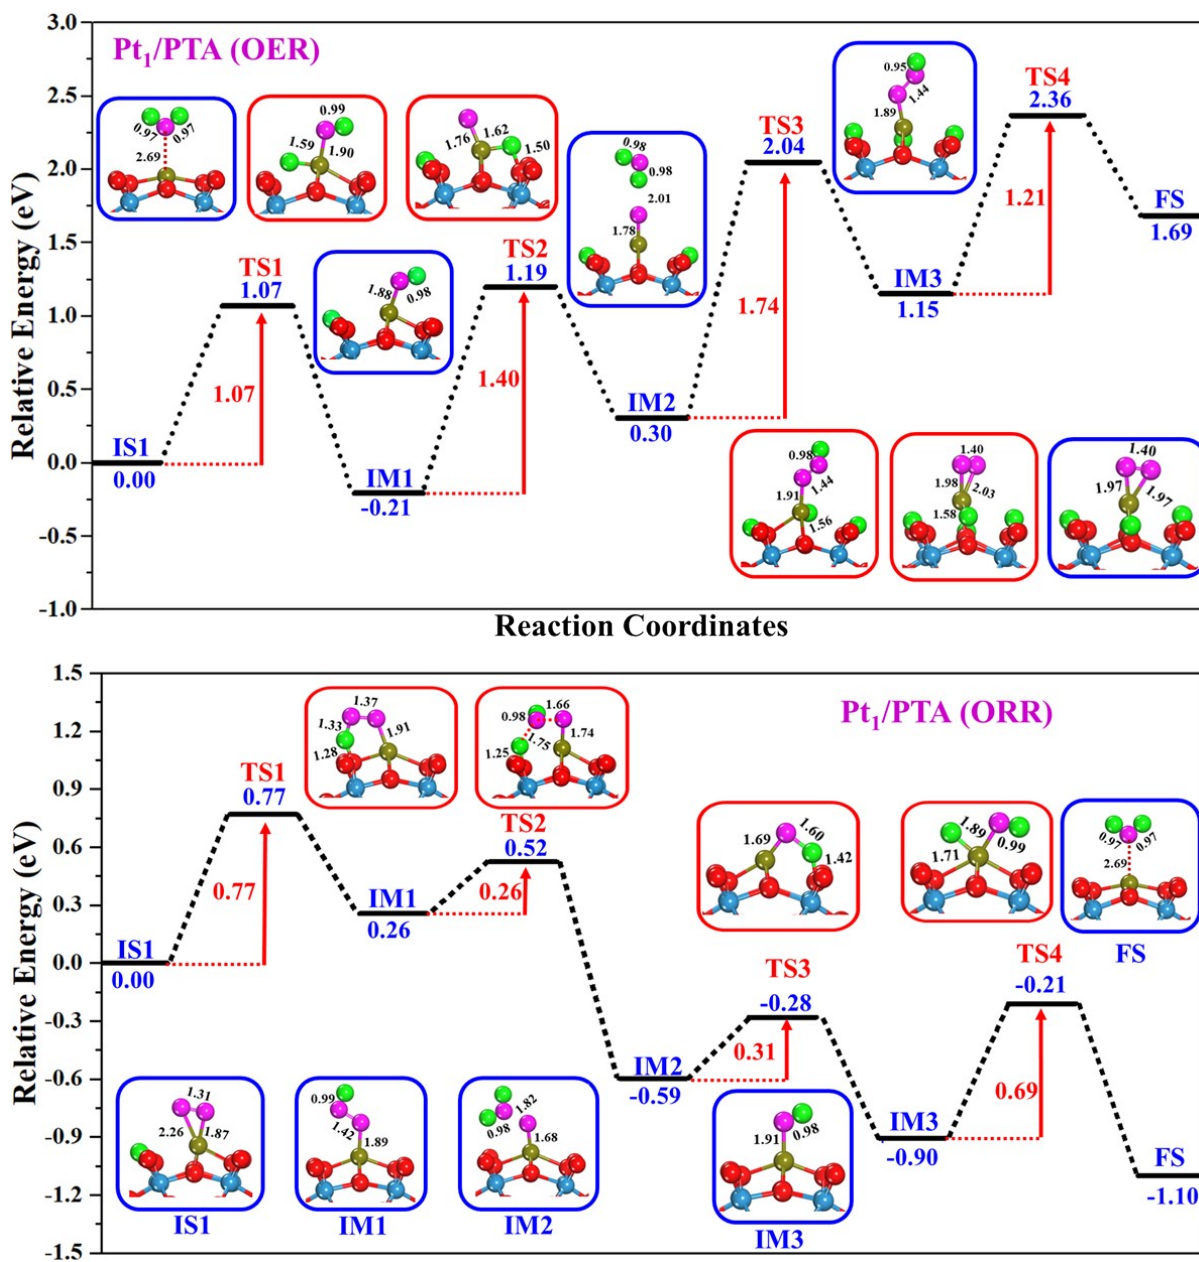

**Fig. S20.** The potential energy profile of the four successive elementary steps involved in the OER and ORR on the surface of Pt<sub>1</sub>/PTA, respectively. All the energies are measured in eV.

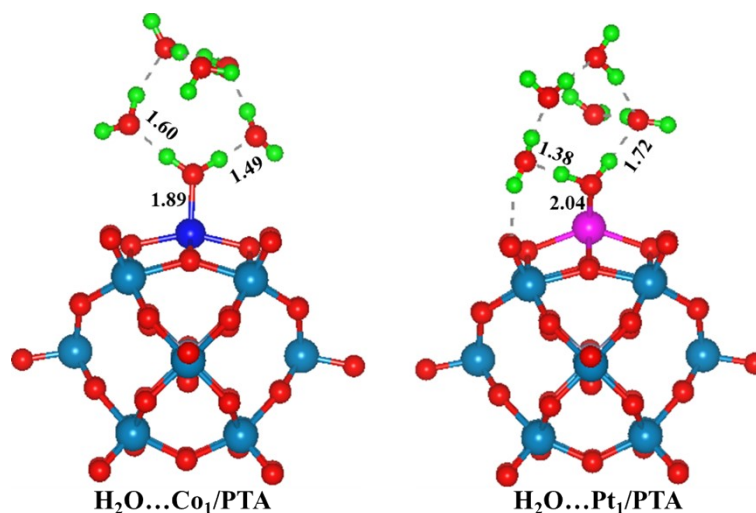

**Fig. S21.** Side views of a chemisorbed  $\text{H}_2\text{O}$  stabilized by  $\text{H}_2\text{O}$  molecules. The cobalt, platinum, tungsten, hydrogen, and oxygen atoms are denoted as blue, pink, sky-blue, green, and red spheres, respectively.

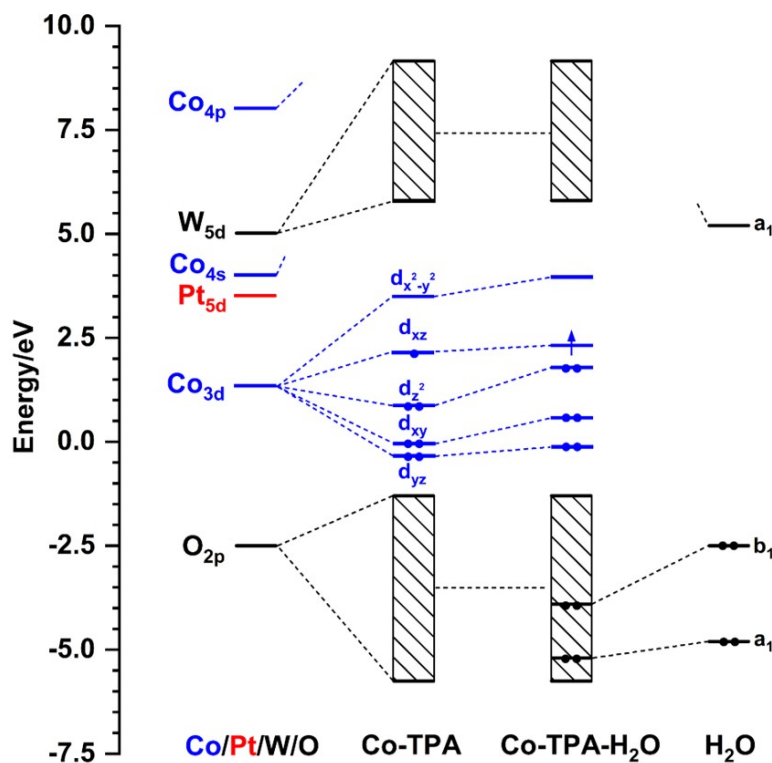

**Fig. S22.** Kohn-Sham energy level of  $\text{Co}_1/\text{PTA}-\text{H}_2\text{O}$  complexes with the fragments of  $\text{C}/\text{PTA}$  and  $\text{H}_2\text{O}$  molecules.

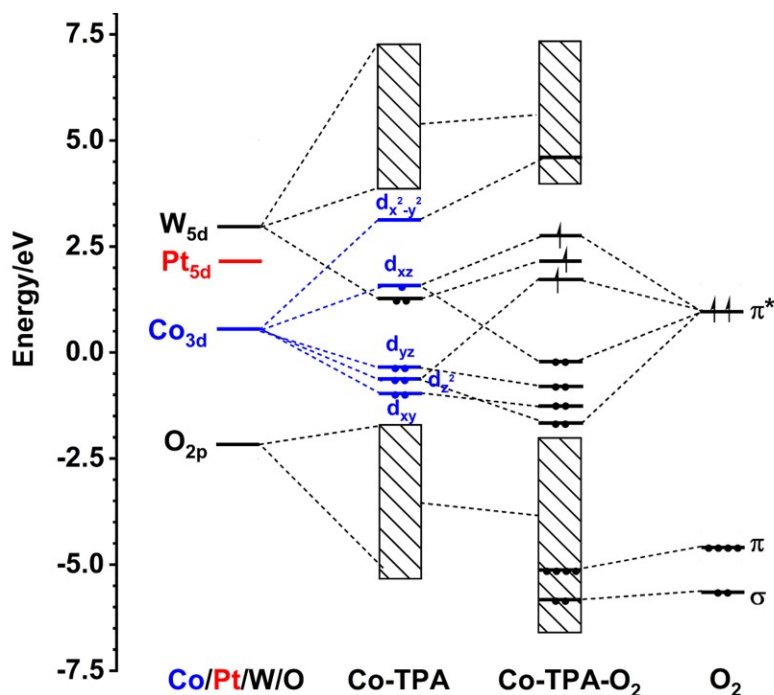

**Fig. S23.** Kohn-Sham energy level of  $\text{Co}_1/\text{PTA-O}_2$  complexes with the fragments of  $\text{Co}_1/\text{PTA}$  and  $\text{O}_2$  molecules. The calculations were performed with the ADF-2019.304 program at the hybrid PBE0 level. The uncontracted Slater-type basis sets with the quality of triple- $\zeta$  plus one polarization functions (TZP) were applied for Co/Pt/W atoms and the uncontracted Slater-type basis sets with the quality of double- $\zeta$  plus one polarization functions (DZP) were used for O atoms.

## References

- (1) Kresse, G.; Furthmüller, J. Efficiency of Ab-Initio Total Energy Calculations for Metals and Semiconductors using a Plane-Wave Basis Set. *Comput. Mater. Sci.* **1996**, *6*, 15-50.
- (2) Kresse, G.; Furthmüller, J. Efficient Iterative Schemes for Ab Initio Total-Energy Calculations using a Plane-Wave Basis Set. *Phys. Rev. B.* **1996**, *54*, 11169-11186.
- (3) Gajdoš, M.; Hummer, K.; Kresse, G.; Furthmüller, J.; Bechstedt, F. Linear Optical Properties in the Projector-Augmented Wave Methodology. *Phys. Rev. B.* **2006**, *73* 045112.
- (4) Axel, D. Becke. Density-Functional Thermochemistry. III. The Role of Exact Exchange. *J. Chem. Phys.* **1993**, *98*, 5648-5652.
- (5) Perdew, J. P.; Chevary, J. A.; Vosko, S. H.; Jackson, K. A.; Pederson, M. R.; Singh, D. J.; Fiolhais, C. Atoms, Molecules, Solids, and Surfaces: Applications of the Generalized Gradient Approximation for Exchange and Correlation. *Phys. Rev. B.* **1992**, *46*, 6671-6687.
- (6) Assessment of the Perdew–Burke–Ernzerhof Exchange–Correlation Functional. *J. Chem. Phys.* **1999**, *110*, 5029-5036.

- (7) Sancho-García, J. C.; Brédas, J. L.; Cornil, J. Assessment of the Reliability of the Perdew–Burke–Ernzerhof Functionals in the Determination of Torsional Potentials in  $\pi$ -Conjugated Molecules. *Chem. Phys. Lett.* **2003**, *377*, 63-68.
- (8) Canto, G.; Salazar-Ehuan, I.; González-Sánchez, J.; Tapia, A.; Quijano, R.; Simonetti, S. Density Functional Theory Study of the Hydrogen Storage in a Vacancy Zone of an Iron-Nickel Cell. *Int. J. Hydrogen Energ.* **2014**, *39*, 8744-8748.
- (9) Lu, X.; T Morelli, D.; Xia, Y.; Ozolins, V. Supplementary Information to "Increasing the Thermoelectric Figure of Merit of Tetrahedrites by Co-doping with Nickel and Zinc". *Chem Mater* **2015**, *27*, 408–413.
- (10) Zhao, S.; Liu, X.-W.; Huo, C.-F.; Li, Y.-W.; Wang, J.; Jiao, H. Determining Surface Structure and Stability of  $\epsilon$ -Fe<sub>2</sub>C,  $\gamma$ -Fe<sub>5</sub>C<sub>2</sub>,  $\theta$ -Fe<sub>3</sub>C and Fe<sub>4</sub>C Phases under Carburization Environment from Combined DFT and Atomistic Thermodynamic Studies. *Catal.Struct. & Reactivity* **2015**, *1*, 44-60.
- (11) Rossmeisl, J.; Qu, Z. W.; Zhu, H.; Kroes, G. J.; Nørskov, J. K. Electrolysis of Water on Oxide Surfaces *J. Electroanal. Chem.* **2007**, *607*, 83-89.
- (12) Gao, G.; Waclawik, E. R.; Du, A. Computational Screening of Two-Dimensional Coordination Polymers as Efficient Catalysts for Oxygen Evolution and Reduction Reaction. *J. Catal.* **2017**, *352*, 579-585.
- (13) Nørskov, J. K.; Rossmeisl, J.; Logadottir, A.; Lindqvist, L.; Kitchin, J. R.; Bligaard, T.; Jónsson, H. Origin of the Overpotential for Oxygen Reduction at a Fuel-Cell Cathode. *J. Phys. Chem. B* **2004**, *108*, 17886-17892.
